1 **ABSTRACT**

2

3 Communication between neighboring tissues plays a central role in guiding organ  
4 morphogenesis. During heart tube assembly, interactions with the adjacent  
5 endoderm control the medial movement of cardiomyocytes, a process referred to  
6 as cardiac fusion. However, the molecular underpinnings of this endodermal-  
7 myocardial relationship remain unclear. Here, we show an essential role for  
8 platelet-derived growth factor receptor alpha (*Pdgfra*) in directing cardiac fusion.  
9 In both zebrafish and mouse, mutation of *pdgfra* inhibits cardiac fusion and can  
10 lead to cardia bifida. Timelapse analysis of individual cardiomyocyte trajectories  
11 reveals misdirected cells in zebrafish *pdgfra* mutants, suggesting that PDGF  
12 signaling steers cardiomyocytes toward the midline. Intriguingly, the ligand  
13 *pdgfaa* is expressed in the endoderm medial to the *pdgfra*-expressing myocardial  
14 precursors. Ectopic expression of *pdgfaa* interferes with cardiac fusion,  
15 consistent with an instructive role for PDGF signaling. Together, these data  
16 uncover a novel mechanism through which endodermal-myocardial  
17 communication guides the cell movements that initiate cardiac morphogenesis.

18

19

1 **IMPACT STATEMENT**

2

3           Studies in zebrafish and mouse implicate the PDGF signaling pathway in

4 the communication between the endoderm and the myocardium that drives

5 medial myocardial movement and thereby initiates cardiac morphogenesis.

6

## 1 INTRODUCTION

2

3 Organogenesis relies upon the coordinated regulation of precisely defined  
4 patterns of cell movement. Multiple precursor cell populations must convene at  
5 the appropriate location and organize into the correct configuration in order to  
6 insure proper organ function. Differential adhesion and paracrine signaling  
7 between neighboring tissues often influence the specific routes traveled by  
8 precursor cells during morphogenesis (Scarpa and Mayor, 2016). However, the  
9 molecular mechanisms through which tissue interactions guide organ assembly  
10 remain poorly understood.

11 Heart formation requires the coordinated movement of myocardial  
12 precursor cells from their bilateral origins toward the embryonic midline, where  
13 they meet and merge through a process called cardiac fusion (Evans et al.,  
14 2010). Cardiac fusion is essential for the construction of the heart tube, which  
15 provides a fundamental foundation for subsequent steps in cardiac  
16 morphogenesis. During cardiac fusion, the medial movement of the myocardium  
17 is considered to be a collective cell behavior: the cardiomyocytes travel along  
18 relatively parallel paths with very little neighbor exchange (Holtzman et al., 2007)  
19 and simultaneously form intercellular junctions and create a primitive epithelial  
20 sheet (Linask, 1992; Manasek, 1968; Stainier et al., 1993; Trinh and Stainier,  
21 2004; Ye et al., 2015). Whether these coherent patterns of myocardial  
22 movement reflect active migration or passive morphogenesis is not yet resolved  
23 (Aleksandrova et al., 2015; Dehaan, 1963; Varner and Taber, 2012; Xie et al.,

1 2016; Ye et al., 2015). In either case, it is important to elucidate the specific  
2 signals that dictate the medial direction of myocardial trajectories during cardiac  
3 fusion.

4         Several lines of evidence indicate that cardiac fusion is mediated by  
5 interactions between the myocardium and the adjacent anterior endoderm. In  
6 both mouse and zebrafish, mutations that block endoderm formation or disrupt  
7 endoderm integrity also inhibit cardiac fusion (Alexander et al., 1999; Holtzman et  
8 al., 2007; Kawahara et al., 2009; Kikuchi et al., 2001; Kupperman et al., 2000; Li  
9 et al., 2004; Mendelson et al., 2015; Molkentin et al., 1997; Osborne et al., 2008;  
10 Ragkousi et al., 2011; Roebroek et al., 1998; Ye and Lin, 2013; Yelon et al.,  
11 1999). Studies tracking both endodermal and myocardial movement in chick  
12 have suggested that endodermal contraction provides a physical force that pulls  
13 the myocardium toward the midline (Aleksandrova et al., 2015; Cui et al., 2009;  
14 Varner and Taber, 2012). However, while endodermal forces may influence  
15 initial phases of cardiac fusion, the observed patterns of endoderm behavior  
16 seem insufficient to account for the entire path traversed by the moving  
17 cardiomyocytes (Aleksandrova et al., 2015; Cui et al., 2009; Varner and Taber,  
18 2012; Xie et al., 2016; Ye et al., 2015). Moreover, observations of myocardial  
19 cell protrusions have suggested that these cells may actively migrate in response  
20 to endodermal cues (Dehaan, 1963; Haack et al., 2014; Ye et al., 2015). While it  
21 is clear that the endoderm plays an important role in facilitating cardiac fusion,  
22 the molecular underpinnings of the endodermal-myocardial relationship are still  
23 unknown.

1           Here, we reveal a novel connection between the endoderm and  
2 myocardium by discovering a new role for platelet-derived growth factor (PDGF)  
3 signaling. PDGFs signal through receptor tyrosine kinases and are well known  
4 for their mitogenic activity (Andrae et al., 2008), as well as for their role in guiding  
5 the migration of mesenchymal cells (Ataliotis et al., 1995; Yang et al., 2008).  
6 However, PDGF signaling has not been previously implicated in heart tube  
7 assembly, even though it is known to be important for later aspects of heart  
8 development, such as the contribution of cardiac neural crest cells to the outflow  
9 tract (Morrison-Graham et al., 1992; Schatteman et al., 1995; Tallquist and  
10 Soriano, 2003), the formation of the inflow tract (Bleyl et al., 2010), and the  
11 formation of epicardial derivatives (Smith et al., 2011).

12           Our analysis of early morphogenetic defects caused by mutation of the  
13 gene encoding PDGF receptor alpha (*Pdgfra*) uncovers an essential function for  
14 *Pdgfra* during cardiac fusion in both zebrafish and mouse. Notably, through live  
15 imaging of individual cell movements in zebrafish mutants, we find that *pdgfra* is  
16 crucial for guiding cardiomyocyte movement toward the midline. Furthermore,  
17 our studies suggest that expression of PDGF ligands by the anterior endoderm  
18 could facilitate interaction of this tissue with the *pdgfra*-expressing myocardial  
19 precursors. Thus, our work supports a model in which PDGF signaling underlies  
20 communication between the endoderm and myocardium and thereby directs the  
21 cell movements that initiate heart tube assembly. These insights into the  
22 regulation of cardiomyocyte behavior provide new ideas regarding the etiology of  
23 diseases associated with aberrant cell movement (Friedl and Gilmour, 2009),

- 1 including congenital heart diseases (CHDs) caused by defective myocardial
- 2 morphogenesis (Bleyl et al., 2010; Briggs et al., 2012; Neeb et al., 2013; Samsa
- 3 et al., 2013).
- 4

## 1 RESULTS

2

### 3 ***refuse-to-fuse (ref)* mutants display cardiac fusion defects**

4 In a screen for ethylnitrosourea-induced mutations that disrupt cardiac  
5 morphogenesis in zebrafish (Auman et al., 2007), we identified a recessive lethal  
6 mutation, *refuse-to-fuse (ref)*, that causes abnormal cardiac chamber morphology.  
7 Instead of the normal curvatures of the wild-type ventricle (Fig. 1A), *ref* mutants  
8 often displayed a bifurcated ventricle at 48 hours post-fertilization (hpf) (Fig. 1B).  
9 This phenotype was the most common among a range of cardiac defects in *ref*  
10 mutants (seen in ~50% of morphologically evident mutants; Fig. 1-Supplement  
11 1); on rare occasions, we found *ref* mutants with cardia bifida, a condition in  
12 which two separate hearts form in lateral positions (seen in ~1% of  
13 morphologically evident mutants; Fig. 1-Supplement 1). The observed bifurcated  
14 ventricle and cardia bifida phenotypes led us to hypothesize that the *ref* mutation  
15 might interfere with cardiac fusion. In wild-type embryos, cardiac fusion results in  
16 the formation of a ring of cardiomyocytes at the midline by the 22 somite stage  
17 (Fig. 1C). In contrast, *ref* mutant cardiomyocytes failed to fuse into a ring and  
18 instead remained in separate bilateral domains (Fig. 1D) or fused only in  
19 posterior positions, creating a horseshoe shape (Fig. 1E). Similar fusion defects  
20 were also observed when examining a broader portion of the anterior lateral plate  
21 mesoderm (ALPM) encompassing the heart fields (Fig. 1F,G and Fig. 5A-F).

22 Since prior studies in zebrafish have shown that defects in endoderm  
23 specification or morphogenesis can inhibit cardiac fusion (Alexander et al., 1999;



1 Holtzman et al., 2007; Kawahara et al., 2009; Kikuchi et al., 2001; Kupperman et  
2 al., 2000; Mendelson et al., 2015; Osborne et al., 2008; Ye and Lin, 2013; Yelon  
3 et al., 1999), we examined the status of the endoderm in *ref* mutants. During  
4 gastrulation stages, the specification and movement of endodermal cells  
5 appeared normal in *ref* mutants (Fig. 1-Supplement 2A-D). In addition, the  
6 differentiation and morphology of the anterior endoderm in *ref* mutants appeared  
7 intact during the stages when cardiac fusion takes place (Fig. 1-Supplement 2E-  
8 H). The normal appearance of the *ref* mutant endoderm was consistent with the  
9 unaltered progress of the endocardial precursor cells in *ref* mutants: endocardial  
10 cells require interactions with the anterior endoderm for their medial movement  
11 during cardiac fusion (Holtzman et al., 2007; Wong et al., 2012; Xie et al., 2016),  
12 and the *ref* mutant endocardium seemed to reach the midline normally (Fig. 1-  
13 Supplement 3). Taken together, our data suggest that defects in myocardial  
14 movement, as opposed to defects in the endoderm, cause the bifurcated cardiac  
15 morphology in *ref* mutants.

16

### 17 ***ref* is a loss-of-function mutation in *pdgfra***

18 In order to identify the genomic lesion responsible for the *ref* mutant  
19 phenotype, we mapped the *ref* locus to a <0.1 cM region on linkage group 20  
20 containing 6 annotated genes (Fig. 2A). Our examination of *ref* mutant cDNA  
21 revealed missplicing in one of these genes, *platelet-derived growth factor*  
22 *receptor alpha* (*pdgfra*) (Fig. 2B). Specifically, we noted that exon 14 was often  
23 omitted or truncated in the *pdgfra* messages detected in *ref* mutant cDNA.

1 Furthermore, *ref* mutant genomic DNA contained a G-to-A mutation in the first  
2 nucleotide of intron 15 of *pdgfra* (Fig. 2C,D). Since a G at the exon/intron  
3 boundary is an essential conserved feature of splice sites, we infer that this  
4 mutation would disrupt *pdgfra* splicing. The misspliced *pdgfra* messages found  
5 in *ref* mutants cause a frameshift in the coding sequence, resulting in a  
6 premature truncation prior to the transmembrane domain of Pdgfra (Fig. 2D). In  
7 concordance with the concept that premature stop codons often lead to  
8 nonsense-mediated decay, we detected a global reduction of *pdgfra* mRNA in *ref*  
9 mutants (Fig. 2E,F).

10 We next compared the *ref* mutant phenotype to the effects of another  
11 mutation in *pdgfra*, *b1059*. The *b1059* allele is a missense mutation that disrupts  
12 a conserved residue within the tyrosine kinase domain of Pdgfra (Eberhart et al.,  
13 2008) (Fig. 2D). Previous studies of *b1059* mutant embryos focused on their  
14 dorsal jaw defects (Eberhart et al., 2008); our analysis also uncovered dorsal jaw  
15 defects in *ref* mutants (Fig. 2-Supplement 2B,E), as well as cardiac fusion  
16 defects in *b1059* mutants (Fig. 2G,I). Through complementation testing, we  
17 found that *ref* and *b1059* fail to complement each other; transheterozygotes  
18 displayed defects in both cardiac fusion (Fig. 2J) and dorsal jaw formation (Fig.  
19 1-Supplement 2C,F). Finally, we found that injection of a morpholino targeting  
20 *pdgfra* also interfered with cardiac fusion (Fig. 2H). Together, our mapping,  
21 sequencing, complementation testing, and morpholino data support the  
22 conclusion that the *ref* mutation causes inappropriate splicing of *pdgfra*, resulting  
23 in diminished *pdgfra* function and cardiac fusion defects.

## 1 **Mutation of *Pdgfra* disrupts heart tube assembly in mice**

2           Although prior work in mouse has revealed functions for PDGF signaling  
3 during later stages of heart development (e.g. Grüneberg and Truslove, 1960;  
4 Richarte et al., 2007; Schatteman et al., 1995), these studies did not report an  
5 earlier role for PDGFR $\alpha$  during cardiac fusion or heart tube assembly. In  
6 contrast, analysis of the *Patch (Ph)* mutant, carrying a chromosome deletion  
7 including *Pdgfra*, did reveal early cardiac phenotypes, as well as yolk sac defects  
8 (Orr-Urtreger et al., 1992). Exploration of the early functions of PDGFR $\alpha$  has  
9 been complicated by the variability of *Pdgfra* mutant phenotypes, due in part to  
10 genetic background (Grüneberg and Truslove, 1960; Orr-Urtreger and Lonai,  
11 1992; Schatteman et al., 1995; Soriano, 1997; Tallquist and Soriano, 2003).  
12 Notably, the C57BL/6 background was reported to generate more severe  
13 phenotypes in the *Ph* mutant (Orr-Urtreger et al., 1992). We therefore chose to  
14 analyze mouse embryos carrying *Pdgfra* null alleles on the C57BL/6 background  
15 at E9.5, using expression of *Nkx2-5* to highlight heart morphology. Our analysis  
16 revealed a range of early defects in cardiac morphogenesis in homozygous  
17 *Pdgfra* mutants (Fig. 3A-E'). By E9.5, wild-type hearts had undergone looping  
18 and exhibited distinct left and right atrial and ventricular chambers (Fig. 3A-A").  
19 Some *Pdgfra* homozygous mutant hearts displayed relatively mild defects in  
20 heart looping as well as in the size and shape of the cardiac chambers and their  
21 inflow and outflow tracts (Fig. 3B,B'). Other *Pdgfra* mutant hearts displayed more  
22 severe disruptions that could be the consequence of abnormal cardiac fusion  
23 (Fig. 3C-E'): examples included embryos with a split inflow/common atrial region

1 connected to a single ventricle (Fig. 3C,D) or with near total cardia bifida (Fig.  
2 3E,E'). The majority of *Pdgfra* mutants died by E10.5, slightly earlier than  
3 reported for the majority of *Ph* mutants (Orr-Urtreger et al., 1992). These data  
4 uncover a previously unappreciated influence of *Pdgfra* on the early stages of  
5 cardiac morphogenesis in mice; in combination with the phenotype of *ref* mutants,  
6 these studies suggest that *Pdgfra* plays a conserved role in regulating heart tube  
7 assembly.

8

### 9 ***pdgfra* is expressed within the ALPM while cardiac fusion is underway**

10 To further elucidate how *Pdgfra* influences heart tube assembly, we next  
11 examined the expression pattern of *pdgfra* during cardiac fusion in zebrafish. We  
12 found robust expression of *pdgfra* within the ALPM and in migrating neural crest  
13 cells (Fig. 4A-D). The domains of *pdgfra* expression in the ALPM matched those  
14 of *hand2* (Fig. 4E-J), which is expressed in the territories that contain myocardial  
15 precursor cells and is excluded from the territories containing endocardial  
16 precursors (Schoenebeck et al., 2007). As cardiac fusion proceeds, *hand2*  
17 continues to be expressed in the cardiomyocytes that reach the midline (Fig. 5A-  
18 C), while *pdgfra* expression appears to be absent from these cells (Fig. 4D).

19 Similarly, we found that mouse *Pdgfra* is expressed in the ALPM at E7.5  
20 (Fig. 3F) and later becomes confined to the caudal aspect of the forming heart  
21 tube by E8.0 (Fig. 3G) and to the inflow tract of the looping heart (Fig. 3H) as well  
22 as the dorsal mesocardium (Prall et al., 2007) by E8.5. In more mature hearts,  
23 *Pdgfra* is expressed in the atrioventricular valves and epicardium (Chong et al.,

1 2011; Orr-Urtreger et al., 1992). Even though *Pdgfra* mRNA levels had declined  
2 in the anterior cardiac mesoderm by the beginning of heart tube formation (Fig.  
3 3G), we found persistent PDGFR $\alpha$  protein expression in the forming heart at this  
4 stage (Fig. 3I). PDGFR $\alpha$  was also found in the more caudal domains defined by  
5 *Pdgfra* mRNA expression, including the caudal aspect of the forming heart  
6 corresponding to its future inflow tract and coelomic mesothelium (Fig. 3I) (Bax et  
7 al., 2010).

8 We did not observe *pdgfra* expression within the anterior endoderm during  
9 cardiac fusion in either zebrafish or mouse (Figs. 3G, 4K-P; (Prall et al., 2007)).  
10 In zebrafish, comparison of *axial* and *pdgfra* expression demonstrated mutually  
11 exclusive expression domains (Fig. 4K-P). Lack of *pdgfra* expression in the  
12 anterior endoderm is also consistent with previous expression analysis in mouse  
13 (Orr-Urtreger and Lonai, 1992), as well as with the lack of anterior endoderm  
14 defects in *ref* mutant embryos (Fig. 1-Supplement 2). Altogether, the *pdgfra*  
15 expression patterns in both zebrafish and mouse indicate that *pdgfra* could act  
16 within the ALPM to regulate the progression of cardiac fusion.

17

## 18 ***pdgfra* controls the medial direction of cardiomyocyte movement during** 19 **cardiac fusion**

20 Although our analysis pointed toward a role for *pdgfra* within the ALPM  
21 during cardiac fusion, we also considered the possibility that *pdgfra* expression in  
22 the early embryo (Ataliotis et al., 1995; Liu et al., 2002; Mercola et al., 1990;  
23 Yang et al., 2008) could indirectly affect cardiac fusion by influencing processes

1 such as mesoderm involution during gastrulation (Yang et al., 2008). However,  
2 we did not observe any defects in the size, shape, or bilateral spacing of the  
3 ALPM in *ref* mutants at the 8-12 somite stages (Fig. 5A,D,G), indicating that early  
4 ALPM morphogenesis is intact in these embryos. Moreover, we found that  
5 pharmacological inhibition of Pdgfr activity at the tailbud stage can disrupt  
6 cardiac fusion (Fig. 5-Supplement 1), further supporting the conclusion that  
7 *pdgfra* activity influences cardiac fusion after gastrulation is complete.

8 To determine when cardiac fusion first goes awry in *ref* mutants, we began  
9 by comparing the distance between the left and right sides of the ALPM in wild-  
10 type and *ref* mutant embryos. Until the 15 somite stage, the spacing between the  
11 bilateral domains of the ALPM was normal in *ref* mutants (Fig. 5G). After the 15  
12 somite stage, the *ref* mutants began to display an evident phenotype: whereas  
13 the two sides of the wild-type ALPM continued to move toward each other, the  
14 sides of the *ref* mutant ALPM stayed apart (Fig. 5B,C,E,F,G). Thus, although the  
15 initial stages of ALPM convergence are unaffected in *ref* mutants, the *ref* mutant  
16 ALPM is unable to approach the midline normally during cardiac fusion.

17 We next sought to elucidate the cellular defects responsible for the  
18 inhibition of cardiac fusion in *ref* mutants. Do *ref* mutant cardiomyocytes move at  
19 a sluggish rate or are they misdirected? Previous studies have shown that VEGF  
20 signaling can regulate the speed of endocardial precursor movement during  
21 cardiac fusion (Fish et al., 2011), suggesting the possibility that PDGF signaling  
22 might set the pace of myocardial precursor movement. Alternatively, PDGF  
23 signaling has been shown to control the direction of mesodermal movement

1 during gastrulation (Damm and Winklbauer, 2011; Nagel et al., 2004), suggesting  
2 that it could also guide the route taken by myocardial cells during cardiac fusion.  
3 To test these hypotheses, we tracked individual cell movements over time, using  
4 the myocardial reporter transgene *Tg(myI7:egfp)* (Holtzman et al., 2007; Huang  
5 et al., 2003) to follow the patterns of cardiomyocyte behavior in live embryos (Fig.  
6 6).

7 We initiated our timelapse analysis at the 16 somite stage, the earliest  
8 timepoint when we could robustly detect *Tg(myI7:egfp)* expression. Consistent  
9 with our analysis of ALPM position (Fig. 5), the bilateral populations of  
10 cardiomyocytes in *ref* mutants were already slightly farther apart than their wild-  
11 type counterparts were at the 16 somite stage (Fig. 6A,C,E). Following the  
12 movements of these cells during cardiac fusion, we found that wild-type  
13 cardiomyocytes display a coherent pattern of collective movement without  
14 significant neighbor exchange (Fig. 6A,B), consistent with our prior work  
15 (Holtzman et al., 2007). Cardiomyocytes in *ref* mutants exhibited similar patterns  
16 of coherent movement (Fig. 6C-F). However, while wild-type cardiomyocytes  
17 moved progressively toward the midline (Fig. 6A,B; Video S1), the medial  
18 movement of *ref* mutant cardiomyocytes seemed severely diminished, even  
19 though these cells still appeared to be in motion (Fig. 6C-F; Videos S2-S3). In  
20 *ref* mutants with a relatively mild phenotype, a posterior subset of  
21 cardiomyocytes still exhibited sufficient medial movement to fuse at the midline  
22 (Fig. 6C,D; Video S2). In more severely affected *ref* mutants, medial movement

1 appeared lost along the entire anterior-posterior extent of the myocardium (Fig.  
2 6E,F; Video S3).

3 Lack of medial movement could be the result of defects in several aspects  
4 of cell behavior including speed, efficiency, and directionality. To distinguish  
5 between these possibilities, we performed quantitative analysis of individual  
6 cardiomyocyte trajectories. Compared to wild-type cardiomyocytes, *ref* mutant  
7 cardiomyocytes moved at a slightly slower average speed (distance/time) (Fig.  
8 6G) and with a slightly reduced efficiency (displacement/distance) (Fig. 6H).  
9 When examining velocity (displacement/time) along particular axes, we found no  
10 difference between the velocities of wild-type and *ref* mutant cardiomyocyte  
11 movement along the anterior-posterior axis (Fig. 6I). However, there was a  
12 substantial difference between the velocities of wild-type and *ref* mutant  
13 cardiomyocyte movement along the medial-lateral axis: the average velocity  
14 along the medial-lateral axis was 0.19 micron/min for wild-type cardiomyocytes,  
15 but was only 0.016 micron/min for *ref* mutant cardiomyocytes (Fig. 6J). This  
16 difference in cell behavior becomes even more striking when considering the  
17 variability in the *ref* mutant phenotype. Two of the six *ref* mutant embryos  
18 examined had a relatively mild phenotype, and the cardiomyocytes in these  
19 embryos exhibited an average medial-lateral velocity similar to that seen in wild-  
20 type embryos (Fig. 6K). In contrast, the other four *ref* mutant embryos displayed  
21 a more severe phenotype, and the cardiomyocytes in these embryos had an  
22 average medial-lateral velocity near or below zero (Fig. 6K). Further examination  
23 of the vectors of cell movement revealed that these deficiencies in medial-lateral



1 velocity reflect the misdirection of *ref* mutant cardiomyocytes. In our wild-type  
2 timelapse data, almost all cardiomyocytes move in the medial direction, whereas  
3 over half of the cardiomyocytes in our *ref* mutant timelapse data show no medial  
4 movement, with many of these cells moving away from the midline (Fig. 6L).  
5 Together, these data reveal that *pdgfra* plays an important role in steering  
6 cardiomyocyte movement toward the midline during cardiac fusion.

7

8 **The *Pdgfra* ligand *pdgfaa* is expressed in the anterior endoderm, adjacent**  
9 **to the ALPM**

10 We next evaluated whether the expression patterns of genes encoding  
11 *Pdgfra* ligands could provide insight into how PDGF signaling confers  
12 directionality to cardiomyocyte movement. Interestingly, we found that *pdgfaa* is  
13 expressed in bilateral domains within the anterior endoderm between the 10-16  
14 somite stages, positioned near the lateral edges of this tissue (Fig. 7A-J). The  
15 expression of *pdgfaa* within the anterior endoderm in zebrafish is grossly  
16 consistent with prior studies demonstrating expression of *Pdgfa* in the mouse  
17 foregut (Palmieri et al., 1992). We readdressed this issue in mouse and found  
18 *Pdgfa* expression in endoderm at the rim of the foregut pocket (Fig. 3J) as well  
19 as in the pharyngeal floor and pharyngeal pouches (Fig. 3J'), regions closely  
20 associated with the forming heart tube at E8.0 and earlier stages. Moreover, the  
21 *pdgfaa* expression domains in zebrafish are medially adjacent to the positions of  
22 the myocardial precursors within the ALPM (Fig. 7K-P), suggesting the possibility

1 of a paracrine relationship between *Pdgfaa* in the endoderm and *Pdgfra* in the  
2 ALPM.

3 To investigate whether the spatially restricted expression of *pdgfaa* is  
4 important for the regulation of cardiac fusion, we induced *pdgfaa* expression  
5 throughout the embryo using the heat-inducible transgene *Tg(hsp70l:pdgfaa-2A-*  
6 *mCherry)*. Following heat shock at the tailbud stage, transgenic embryos  
7 displayed cardiac fusion defects similar to those observed in *ref* mutants (Fig.  
8 7Q-S). The ability of ectopic *pdgfaa* expression to disrupt cardiac fusion  
9 indicates that PDGF signaling has the potential to serve as an instructive  
10 influence in directing cardiomyocytes towards the midline.

11

## 1 **DISCUSSION**

2

3           Taken together, our studies point to a model in which the PDGF signaling  
4 pathway facilitates communication between the endoderm and the myocardium  
5 and thereby directs cardiomyocytes toward the midline during cardiac fusion. We  
6 propose that PDGF ligands, produced by the anterior endoderm, signal through  
7 the *Pdgfra* receptor in the ALPM in order to control the directionality of  
8 cardiomyocyte behavior. This connection parallels other examples in which  
9 PDGF ligand-receptor pairs in adjacent tissues influence cell movements (e.g. in  
10 the kidney, neural crest, and gastrulating mesoderm (Eberhart et al., 2008;  
11 Lindahl et al., 1998; Yang et al., 2008)), highlighting a paradigm for how tissue-  
12 tissue interactions establish the landscape of organogenesis (Andrae et al.,  
13 2008; Hoch and Soriano, 2003). Importantly, this new function for PDGF  
14 signaling represents the first insight into a pathway that guides the medial  
15 direction of cardiomyocyte movement. Moreover, these findings uncover a  
16 previously unappreciated molecular basis for the interactions between the  
17 endoderm and the myocardium that govern cardiac fusion.

18           How might PDGF signaling confer directionality on the collective behavior  
19 of the cardiomyocytes? In the absence of *pdgfra* function, myocardial movement  
20 is no longer directed toward the midline, implicating PDGF signaling in the  
21 arrangement of the forces that steer this epithelial tissue. One intriguing  
22 possibility is that PDGF signaling could direct medial movement via polarized  
23 *Pdgfra* activation that controls oriented formation of active protrusions, akin to the

1 activity of the PDGF/VEGF receptor Pvr in *Drosophila*, which directs the  
2 collective movement of the epithelial border cells during oogenesis and the  
3 epidermal cells during dorsal closure (Duchek et al., 2001; Garlena et al., 2015).  
4 Alternatively, PDGF signaling could promote other types of epithelial  
5 reorganization that could facilitate directional movement, such as the  
6 rearrangement of adherens junctions or extracellular matrix at the medial edge of  
7 the myocardium, causing epithelial deformations that drive movement forward  
8 (Xu et al., 2005; Yang et al., 2008). Future examination of the relationship of  
9 PDGF signaling to the subcellular characteristics of the myocardium during  
10 cardiac fusion will help to elucidate the precise morphogenetic consequences of  
11 Pdgfra activity.

12 It is likely that the PDGF signaling pathway works in parallel with  
13 additional pathways to influence cardiac cell movement during cardiac fusion.  
14 Although *ref* mutants fail to undergo proper cardiac fusion, they do not fully  
15 phenocopy mutants with primary endoderm defects (e.g. *casanova* (*cas*; *sox32*)  
16 or *miles apart* (*mil*; *s1pr2*) (Alexander et al., 1999; Kikuchi et al., 2001;  
17 Kupperman et al., 2000; Ye and Lin, 2013; Yelon et al., 1999)). In *cas* and *mil*  
18 mutants, both the endocardial and myocardial precursors fail to move to the  
19 midline (Holtzman et al., 2007; Wong et al., 2012; Xie et al., 2016); moreover,  
20 their myocardial movement defects can be detected prior to the 8 somite stage  
21 (Ye et al., 2015). In contrast, the endocardial precursors seem to reach the  
22 midline normally in *ref* mutants, and the *ref* myocardial movement defects  
23 emerge only after the 15 somite stage. Most likely, other factors, such as VEGF

1 signaling to the endocardium (Fish et al., 2011) or mechanical forces from the  
2 endoderm (Aleksandrova et al., 2015; Varner and Taber, 2012), collaborate with  
3 PDGF signaling to control distinct aspects of endocardial and myocardial cell  
4 behavior during earlier and later phases of cardiac fusion.

5       The cardiomyocyte movements that occur during cardiac fusion, guided by  
6 interactions with the endoderm, establish a foundation of proper tissue  
7 orientation and morphology upon which to assemble the initial heart tube. Our  
8 studies in zebrafish and mouse reveal a conserved influence of PDGF signaling  
9 on heart tube assembly. This influence is likely to be relevant to CHD in humans,  
10 since defects in cardiac morphology can originate in the cardiac precursor  
11 populations involved in cardiac fusion and heart tube assembly (Prall et al., 2007;  
12 Vincent and Buckingham, 2010). More generally, the molecular mechanisms  
13 that control the direction of cardiomyocyte movement are likely to be relevant to  
14 the etiology of disorders that are caused by anomalous cell movement,  
15 potentially including ventricular septal defects, atrial septal defects, outflow tract  
16 defects, and trabeculation abnormalities (Bax et al., 2010; Bruneau, 2008; Ding  
17 et al., 2004; Neeb et al., 2013; Samsa et al., 2013), as well as inflow tract defects  
18 known to be associated with mutations in *PDGFRA* (Bleyl et al., 2010). *PDGFRA*  
19 is deleted in a number of human families showing total anomalous pulmonary  
20 venous return (TAPVR), in which the pulmonary arteries connect with the  
21 systemic venous system instead of the left atrium, a defect replicated in mouse  
22 and chick loss-of-function models (Bleyl et al., 2010). TAPVR occurs in 1 in  
23 15,000 live births and, while life-threatening, is at the mild end of the spectrum of

1 morphogenetic defects that we have observed in *Pdgfra* knockout mice. Thus,  
2 our studies suggest the possibility of a broader involvement of *PDGFRA*  
3 mutations in CHD, specifically through their effects on heart tube assembly, and  
4 more globally as part of the spectrum of diseases associated with aberrant  
5 cardiac cell movements.  
6

## 1 MATERIALS AND METHODS

### 2 Zebrafish

3 We used the following transgenic and mutant strains of zebrafish:

4 *Tg(myl7:egfp)<sup>twu34</sup>* (Huang et al., 2003), *Tg(fli1a:negfp)<sup>y7</sup>* (Roman et al., 2002),

5 *Tg(sox17:egfp)<sup>ha01</sup>* (Mizoguchi et al., 2008), *pdgfra<sup>b1059</sup>* (Eberhart et al., 2008),

6 and *ref (pdgfra<sup>sk16</sup>*; this paper). The *Tg(hsp70l:pdgfaa-2A-mCherry)<sup>sd44</sup>*

7 transgene was assembled using the D-Topo vector (Invitrogen) with a *pdgfaa*

8 cDNA lacking the stop codon (Eberhart et al., 2008), in combination with

9 established Gateway cloning vectors (Kwan et al., 2007). The final destination

10 vector was created by inserting a *Cryaa:CFP* cassette (Hesselson et al., 2009)

11 into the pDestTol2pA4 vector (gift from K. Kwan). Transgenic founders were

12 established using standard techniques for Tol2-mediated transgenesis (Fisher et

13 al., 2006). We analyzed F2 embryos from four separate transgenic lines to

14 evaluate the effect of *pdgfaa* overexpression on cardiac fusion. Embryos were

15 heat shocked at 38°C for 45 min beginning at the tailbud stage and were then

16 returned to 28°C. Transgenic and nontransgenic sibling embryos were

17 distinguished based on their expression of mCherry following heat shock. All

18 zebrafish work followed protocols approved by the UCSD IACUC.

19

### 20 Mice

21 *Pdgfra* null embryos were generated by intercrossing heterozygous

22 *Pdgfra<sup>tm11(EGFP)Sor</sup>* (Hamilton et al., 2003) mutant mice on the C57BL/6

23 background. In situ hybridization and immunohistochemistry were performed

1 using standard protocols (Prall et al., 2007), and genotyping was performed as  
2 described for Jax stock #007669 (<https://www.jax.org/strain/007669>). Images  
3 were captured using a Leica M125 microscope outfitted with a Leica DFC295  
4 camera and processed using Adobe Photoshop. All mouse experiments were  
5 overseen by the Garvan Institute of Medical Research/St. Vincent's Hospital  
6 Animal Ethics Committee.

7

## 8 **Positional cloning and genotyping**

9 Meiotic recombinants were mapped using polymorphic SSLP and SNP  
10 markers to identify a small critical interval on linkage group 20; PCR primers  
11 used for mapping are provided in Figure 2-Supplement 1. Sequence analysis of  
12 candidate genes was performed on cDNA from homozygous wild-type and *ref*  
13 mutant embryos.

14 PCR genotyping was used to identify *ref* mutant embryos following  
15 phenotypic analysis. The primer pair 5'-GTAGGTAAGTAAAGCTGGTA-3' and  
16 5'-CAAGGGTGTGTTGAACCTGA-3' amplifies a 136 bp PCR product flanking the  
17 e14i15 boundary in the *pdgfra* locus and creates a KpnI restriction site within the  
18 wild-type allele, but not within the *ref* mutant allele. Digestion of the wild-type  
19 PCR product with KpnI creates fragments of 113 and 23 bp.

20

## 21 **Morpholinos and inhibitors**

22 A *pdgfra* morpholino (5'-CACTCGCAAATCAGACCCTCCTGAT-3') was  
23 designed to disrupt the splicing of exon 11 and thereby lead to premature



1 truncation of *Pdgfra* prior to its kinase domain. We injected 12 ng of morpholino  
2 at the 1-cell stage; this dose did not induce visible toxicity. Furthermore, injection  
3 of this morpholino into *ref* mutants did not increase the frequency or severity of  
4 their cardiac fusion defects.

5 For pharmacological inhibition of PDGF signaling (Kim et al., 2010), we  
6 incubated embryos in *Pdgfr* inhibitor V (Calbiochem 521234) from the tailbud  
7 stage until the 22 somite stage. Three separate experiments were performed,  
8 using doses of 0.25-0.4  $\mu$ M.

9

#### 10 **In situ hybridization, immunofluorescence, and Alcian blue staining**

11 The following probes and antibodies were used: *myl7* (ZDB-GENE-  
12 991019-3), *axial/foxa2* (ZDB-GENE-980526-404), *sox17* (ZDB-GENE-991213-1),  
13 *hand2* (ZDB-GENE-000511-1), *pdgfra* (ZDB-GENE-990415-208), *pdgfaa* (ZDB-  
14 GENE-030918-2), anti-GFP (Abcam ab13970; 1:1000), anti-ZO-1 (Zymed 33-  
15 9100; 1:200), and donkey anti-mouse Alexa 488 (Invitrogen; 1:300). Standard in  
16 situ hybridization, fluorescent in situ hybridization, and immunofluorescence were  
17 performed using established protocols (Alexander et al., 1998; Brend and Holley,  
18 2009; Yelon et al., 1999). Fluorescent in situ hybridization was combined with  
19 immunofluorescence as previously described (Zeng and Yelon, 2014). Standard  
20 in situ hybridization was combined with visualization of transgene expression by  
21 creating transverse sections following in situ hybridization, using standard  
22 cryoprotection, embedding, and sectioning techniques (Garavito-Aguilar et al.,  
23 2010) and then performing standard immunofluorescence for GFP on sections.

1 Alcian blue staining was performed as previously described (Kimmel et al., 1998).

2 Trunks were removed for genotyping prior to Alcian staining.

3 Images were captured using Zeiss M2Bio, AxioZoom and AxioImager

4 microscopes outfitted with AxioCam cameras and processed with Adobe

5 Photoshop. Confocal stacks were collected using a Leica SP5 confocal laser-

6 scanning microscope and processed using Imaris (Bitplane).

7

### 8 **Timelapse imaging and cell tracking**

9 *Tg(myl7:egfp)* embryos at the 14 somite stage were mounted head down

10 in 0.8% low-melt agarose and placed on a coverslip bottom dish in wells made

11 from a layer of 3% agarose. Timelapse images were collected using a Leica SP5

12 confocal microscope with a 20X objective, in a chamber heated to 28°C.

13 Confocal stacks of GFP and brightfield images were collected every 4 min for 2-3

14 hrs, starting around the 16 somite stage. In each stack, 30 confocal slices

15 spanning the expression of *Tg(myl7:egfp)* were collected at ~3 μm intervals.

16 Embryos were retained after completion of imaging, and we only analyzed data

17 from embryos that appeared healthy for 24 h following the timelapse.

18 Image processing and cell tracking was performed on three-dimensional

19 reconstructions generated with Imaris, using the semi-automated cell tracking

20 module. In each embryo, we tracked 20-30 cells from the 2 most medial columns

21 of cardiomyocytes on each side. Only tracks in which a cell position could be

22 determined for each timepoint were used for further analysis. We also tracked

23 the tip of the notochord in brightfield images at each timepoint. Although we

1 observed a slight posterior retraction of the notochord over the course of our  
2 timelapse analysis, we found that this was the most consistent landmark to use  
3 as a reference point to correct for drift that occurred during imaging. Thus, the  
4 movement of the tracked notochord tip was subtracted from the movement of  
5 each tracked cardiomyocyte. Our wild-type tracking data were largely consistent  
6 with our prior studies (Holtzman et al., 2007), including the velocity of movement,  
7 coherence of movement, lack of cell movement in the Z-axis, and direction of  
8 wild-type cardiomyocyte trajectories. Subtle differences between these two data  
9 sets are likely due to our current use of the notochord as a reference point and  
10 the slightly later stage at which we initiated these timelapse experiments.

11 For quantitative analysis of cardiomyocyte movement, we extracted the X  
12 and Y position of each cell at each timepoint along its track, as previously  
13 described (Holtzman et al., 2007). Cell movement properties, including overall  
14 speed (distance/time), efficiency (displacement/distance), velocity  
15 (displacement/time), and direction, were then calculated for each individual  
16 cardiomyocyte. Velocity measurements were split into their X (medial-lateral)  
17 and Y (anterior-posterior) components. Cells along the anterior-posterior axis  
18 were further divided into top, middle, and bottom subsets, as in our prior work  
19 (Holtzman et al., 2007). Direction was calculated as  $\arctan[\text{abs}(y\text{-}$   
20  $\text{displacement})/(\text{x-displacement})]$ , after aligning movement between the left and  
21 right sides. Graphs were made using Matlab (Mathworks) and Prism (Graphpad)  
22 software.  
23

## 1 **Statistics and replication**

2 All statistical analyses were performed using a two-tailed unpaired  
3 Student's T-test. No statistical methods were used to predetermine sample sizes.  
4 Instead, sample sizes were determined based on prior experience with relevant  
5 phenotypes and standards within the zebrafish and mouse communities. All  
6 results were collected from at least two independent experiments (technical  
7 replicates) in which multiple embryos, from multiple independent matings, were  
8 analyzed (biological replicates).

9

10

## 1 **ACKNOWLEDGEMENTS**

2 We thank members of the Yelon lab and N. Chi, S. Evans, D. Traver, P. Soriano,  
3 G. Crump, and J. Schoenebeck for valuable discussions, as well as J. Eberhart  
4 and K. Kwan for providing reagents.

5

## 6 **COMPETING INTERESTS**

7 No competing interests declared.

8

## 9 **AUTHOR CONTRIBUTIONS**

10 JB: Conception and design, acquisition of data, analysis and interpretation of  
11 data, writing the manuscript. RS: Conception and design, acquisition of data,  
12 analysis and interpretation of data, writing the manuscript. OWJP: Conception  
13 and design, acquisition of data, analysis and interpretation of data. ACD:  
14 Acquisition of data. MV: Acquisition of data. CL: Acquisition of data. RPH:  
15 Conception and design, analysis and interpretation of data, writing the  
16 manuscript. DY: Conception and design, analysis and interpretation of data,  
17 writing the manuscript.

18

## 19 **FUNDING**

20 This work was supported by grants to DY from the National Institutes of Health  
21 (NIH) [R01HL081911 and R01HL133166] and from the March of Dimes [1-FY11-  
22 493], to RPH and OWJP from the National Health and Medical Research Council  
23 of Australia [NHMRC 1074386; 573732; 5737707] and to RPH from the

- 1 Australian Research Council Strategic Initiative in Stem Cell Science [*Stem Cells*
- 2 *Australia* SR110001002]. JB was supported by an American Heart Association
- 3 Postdoctoral Fellowship [12POST11660038]. OWJP was supported by an
- 4 Australian Heart Foundation Career Development Fellowship [CR 08S 3958].
- 5 RPH was supported by an NHMRC Australia Fellowship [573705].
- 6

## FIGURE LEGENDS

### Figure 1. Cardiac fusion defects in *refuse-to-fuse* (*ref*) mutants.

**(A,B)** Three-dimensional reconstructions depict wild-type (wt) and *ref* mutant hearts expressing the myocardial reporter transgene *Tg(myI7:egfp)* at 48 hpf. In contrast to the normal contours of the wt heart (A), the *ref* mutant heart (B) often displays a bifurcated, two-lobed ventricle and a misshapen atrium. See also Fig. 1-Supplement 1 for a description of the range of cardiac phenotypes in *ref* mutants at 48 hpf. A: atrium; V: ventricle.

**(C-G)** Dorsal (C-E) and ventral (F,G) views, anterior to the top, of wt (C,F) and *ref* (D,E,G) mutant embryos displaying the expression of *myI7* at the 22 somite stage (22 s; C-E) and the localization of ZO-1 at the 18 somite stage (18 s; F,G). (C-E) In *ref* mutants, cardiomyocytes fail to fuse at the midline (D; 8 out of 20 *ref* mutants) or only fuse posteriorly (E; 7 out of 20 *ref* mutants) by 22 s. The *ref* mutation is incompletely penetrant; 5 out of 20 homozygous mutant embryos exhibited successful cardiac fusion at 22 s. (F,G) ZO-1 localization highlights junctions forming within the maturing epithelium of the ALPM in both wt and *ref* mutant embryos. The ventral portion of the neural tube located at the midline is also visible. By 18 s, the wt ALPM (F) has initiated fusion at the midline, whereas the two sides of the *ref* mutant ALPM are still separate (G). Scale bars: 60  $\mu$ m.

**Figure 1 – Figure Supplement 1. *ref* mutant embryos display a range of cardiac defects.**

**(A,B)** Lateral views of live wild-type (wt, A) and *ref* mutant (B) embryos at 48 hpf. *ref* mutants exhibit a mild pericardial edema.

**(C-F)** Lateral views from the right side of wt (C) and *ref* mutant (D-F) hearts reveal a variety of abnormal cardiac morphologies in *ref* mutants. In our analysis of 454 *ref* mutants with morphologically evident phenotypes, 229 had a bifurcated ventricle (D), 74 did not undergo normal looping (E), 147 had a severely shrunken heart (F), and 4 had cardia bifida (not shown). Furthermore, the *ref* mutation is incompletely penetrant: approximately 10% of the progeny from intercrosses of heterozygotes display abnormal cardiac morphology at 48 hpf (n=58/522).

**(C'-F')** Cartoons outline the cardiac morphologies shown in C-F, with the ventricle in magenta and the atrium in green.



**Figure 1 – Figure Supplement 2. The anterior endoderm forms normally in *ref* mutant embryos.**

**(A-D)** Lateral views, dorsal to the right, depict the expression of *axial* at 8.5 hpf (A,B) or *sox17* at 8 hpf (C,D). The number and distribution of endoderm precursor cells is similar in wt (A,C) and *ref* mutant (B, n=8/8; D, n=14/14) embryos during gastrulation stages.

**(E-H)** Dorsal views, anterior to the top, depict the anterior endoderm, visualized with the expression of *axial* at 24 hpf (E,F) or the endodermal reporter transgene *Tg(sox17:egfp)* at 18 s (G,H). The width and morphology of the anterior endoderm is similar in wt (E,G) and *ref* mutant (F, n=13/13; H, n=7/7) embryos during the stages when cardiac fusion takes place. Scale bars: 60  $\mu$ m.

**Figure 1 – Figure Supplement 3. Endocardial cells move to the midline in *ref* mutant embryos.**

**(A,B)** Dorsal views, anterior to the top, depict the expression of the endothelial reporter transgene *Tg(fli1a:negfp)* in the endocardial precursor population at 18 s (n=8). In both wt (A) and *ref* mutant (B) embryos, the endocardial precursors move to the midline during the process of cardiac fusion. Scale bars: 60  $\mu$ m.

**Figure 2. *ref* is a loss-of-function mutation in *pdgfra*.**

**(A)** Polymorphic markers (z21170, *kdr\_e28*, *5'scfd2*, z14614) were used to map meiotic recombination events, narrowing the region containing the *ref* mutation to <0.1 cM on linkage group (LG) 20. (See also Fig. 2-Supplement 1.) Fractions indicate frequencies of proximal (magenta) and distal (green) recombination between markers and *ref*. Six annotated genes are present in this region (GRCv10); sequence analysis of *kdr*, *kita*, *gsx2*, *Inx1*, and *fip111a* in *ref* mutants revealed only missense mutations that led to conserved amino acid changes.

**(B)** RT-PCR spanning exons 13-19 of *pdgfra* generates a single, properly spliced product from homozygous wt embryos and multiple, smaller products from *ref* mutant embryos. Sequencing revealed that exon 14 was either omitted or truncated in these smaller products; in all cases, the observed missplicing would result in a frameshift followed by a premature stop codon. RT-PCR of *gapdh* demonstrates use of comparable amounts of template.

**(C,D)** Sequencing the e14i15 exon-intron boundary of *pdgfra* revealed that *ref* mutant genomic DNA contains a G-to-A mutation in a conserved intronic nucleotide required for proper splicing. Chromatograms (C) and sequence alignment (D) show position of the mutation relative to reference sequences. Schematics (D) depict the proteins predicted to result from the wt, *ref*, and *b1059* alleles of *pdgfra*; immunoglobulin (magenta), transmembrane (green), and tyrosine kinase (blue) domains are shown.

**(E,F)** Lateral views depict expression of *pdgfra* at 11 s. Expression levels are lower in *ref* mutants (F; n=5/5) than in wt (E).

**(G-J)** Dorsal views, anterior to the top, of *myl7* expression at 22 s. In contrast to wt (G), cardiac fusion defects are evident in embryos injected with a *pdgfra* morpholino (MO) (H; n = 5/12), *b1059* homozygous mutant embryos (I; n = 12/13), and *ref/b1059* transheterozygous mutant embryos (J; n = 12/12). Scale bars: 60  $\mu$ m.

**Figure 2 – Figure Supplement 1. Primers used to map recombinants.**

| <b>Marker</b> | <b>Forward primer</b>   | <b>Reverse primer</b> |
|---------------|-------------------------|-----------------------|
| 5'SCFD2       | CGCGTTACCAGAGAGACACA    | TTCTCGGCAGGATAAATTGG  |
| Z14614        | AAACACATGCACAATGGTAGAAA | CAGCAAGTTCAGCCAAAACA  |
| Z21170        | AAACATTGCTTTTGGCCACT    | CTCACTCCCCCACA CTGTTT |
| kdr_e28       | TATGATAACGCTCCGCCTCT    | CAGGGGAATGTCCACAAAAC  |

**Figure 2 – Figure Supplement 2. *ref* mutants display craniofacial defects.**

**(A-F)** Lateral (A-C) and ventral (D-F) views of embryos at 6 days post-fertilization (dpf), stained with Alcian blue to show the dorsal and ventral cartilage in the head. Embryos homozygous for *ref* (B,E; n=9/9) or transheterozygous for *ref* and *b1059* (C,F; n=5/6) display similar dorsal cartilage formation defects.

Specifically, the dorsal ethmoid plate is diminished or absent in these mutants.

Scale bars: 60  $\mu$ m.

**(D'-F')** Cartoons illustrate the dorsal cartilage structures shown in D-F.

**Figure 3. *Pdgfra* mouse mutants display defects in heart tube assembly.**

**(A-E')** Ventral views (A,B,D,E), lateral views (A',B',C), and transverse sections (A'',E'') depict *Nkx2-5* expression in wt (A-A'') and *Pdgfra* homozygous mutant (B-E'') mice on the C57BL/6 strain background at E9.5. Some *Pdgfra* mutants display relatively mild cardiac defects (B,B'; 4 out of 14 homozygous mutants), including defects in heart tube rotation. Other *Pdgfra* mutants display severe cardiac defects that could result from hindered cardiac fusion (C-E'; 9 out of 14 homozygous mutants). These defects include incomplete heart tube assembly (C,D) with two inflow/common atrial regions (red arrows) and a single ventricle (black arrowhead) or with cardia bifida (E,E'; arrows indicate unfused ventricles and atria). Note that we encountered *Pdgfra* null mutants on the C57BL/6 background less often than predicted by a Mendelian ratio (14 mutants recovered from a total of 108 embryos at E9.5), in keeping with other studies implicating *Pdgfra* in pre-implantation embryogenesis (Artus et al., 2013; Artus et al., 2010), as well as during gastrulation (Nagel et al., 2004; Yang et al., 2008). Also, *Pdgfra* mutant embryos on the C57BL/6 background were often smaller than wild-type littermates, consistent with previous observations (Orr-Urtreger et al., 1992); however, the observed severe cardiac defects (C-E') are not likely a result of general developmental delay, as these mutant phenotypes do not resemble wild-type cardiac morphology at younger stages. A: atrium; AVC: atrioventricular canal; LA: left atrium; LV: left ventricle; OFT: outflow tract; RA: right atrium; RV: right ventricle; V: ventricle. Scale bars: 100  $\mu$ m.

**(F-I)** Ventral views depict localization of *Pdgfra* mRNA (F-H) and PDGFR $\alpha$

protein (I) in wt embryos from E7.5 to E8.5. *Pdgfra* expression is seen in anterior lateral plate mesoderm (ALPM) at E7.5 (F) and persists in the caudal region of the forming heart at E8.0 (G; arrows) and in the inflow tract at E8.5 (H; arrows). *Pdgfra* is also expressed in somites (S) and caudal lateral plate mesoderm (LPM) at E8.0-E8.5. Although mRNA levels are diminished, PDGFR $\alpha$  protein localization is maintained throughout the forming heart at E8.0 (I). FH: forming heart; H: heart.

**(J,J')** Ventral view (J) and transverse section (J') depict the localization of *Pdgfa* mRNA at E8.0. Black line in J indicates plane of transverse section shown in J'. At this stage, *Pdgfa* expression is seen in the foregut endoderm (Fg) and lateral ectoderm.



**Figure 4. *pdgfra* is expressed within the ALPM while cardiac fusion is underway.**

**(A-D)** Dorsal views, anterior to the top, depict *pdgfra* expression in wt embryos at 10 s (A), 12 s (B), 14 s (C), and 18 s (D). Arrows (A) indicate *pdgfra* expression in the ALPM and the neural crest (NC). Asterisk (D) denotes position of the myocardium by 18 s; although *pdgfra* is expressed in the myocardial precursors within the ALPM at earlier stages, its expression in these cells appears to be gone by this time point.

**(E-J)** Comparison of *hand2* (green) and *pdgfra* (red) expression patterns demonstrates their overlap in the wt ALPM at 10 s. **(E-G)** Three-dimensional confocal reconstructions of dorsal views, anterior to the top, focused on the left side of the ALPM (area outlined by a dashed box in A). Arrows (E) indicate *pdgfra* expression in the ALPM and the NC. **(H-J)** Single transverse (XZ) sections from **(E-G)**, respectively. Yellow arrow (H) indicates overlap of *hand2* and *pdgfra* expression in the ALPM.

**(K-P)** Comparison of *axial* (green) and *pdgfra* (red) expression patterns demonstrates lack of *pdgfra* expression in the *axial*-expressing anterior endoderm in wt embryos at 12 s. **(K-M)** Three-dimensional confocal reconstructions of dorsal views, anterior to the top; arrows (K) indicate *pdgfra* expression in the ALPM and the neural crest. **(N-P)** Single transverse (XZ) sections from **(K-M)**, respectively. Arrowheads (N) indicate *axial* expression in the anterior endoderm, adjacent to, but not overlapping with, *pdgfra* expression in the ALPM. Scale bars: 60  $\mu\text{m}$ .

**Figure 5. *pdgfra* influences the movement of the ALPM after the 15 somite stage.**

**(A-F)** Dorsal views, anterior to the top, depict expression of *hand2* in the wt (A-C) and *ref* mutant (D-F) ALPM from 12-20 s. The morphology and position of the ALPM are indistinguishable in wt (A) and *ref* mutant (D) embryos at 12 s. After 15 s (B,C,E,F), disrupted movement of the ALPM is evident in *ref* mutants. Scale bars: 60  $\mu\text{m}$ .

**(G)** Graph illustrates the average distance between the two sides of the ALPM in wt and *ref* mutant embryos from 8-20 s. In each embryo, the distance between the sides of the ALPM was calculated by measuring the distance between the medial edges of the *hand2*-expressing domains at three equidistant points (200  $\mu\text{m}$  apart) along the anterior-posterior axis. The largest of those three measurements was selected as representative of the maximum distance between the bilateral ALPM domains for that embryo. Dots represent the selected measurements from individual embryos. The distance between the bilateral sheets in *ref* mutant embryos begins to diverge significantly from wt after 15 s. Error bars represent the standard error. Asterisks indicate  $p < 0.05$  (Student's T-test):  $p = 0.99$  at 8 s;  $p = 0.58$  at 12 s;  $p = 0.30$  at 14 s;  $p = 0.053$  at 15 s;  $p = 0.012$  at 16 s; and  $p = 0.00012$  at 20 s.

**Figure 5 – Figure Supplement 1. PDGF signaling is required after gastrulation for proper cardiac fusion.**

**(A,B)** Dorsal views, anterior to the top, display *myl7* expression at 22 s in representative embryos treated with DMSO (A) or Pdgfr inhibitor V (B) from the tailbud stage until 22 s. DMSO-treated control embryos exhibited normal cardiac fusion (19/22 treated embryos), whereas treatment with Pdgfr inhibitor V disrupted cardiac fusion (22/29 treated embryos). Scale bar: 60  $\mu$ m.

**Figure 6. *pdgfra* regulates the directionality of cardiomyocyte movement.**

**(A-F)** Representative timelapse experiments indicate patterns of cell movement in wt (A,B) and *ref* mutant (C-F) embryos carrying the *Tg(myl7:egfp)* transgene. (A,C,E) Three-dimensional confocal reconstructions of select timepoints within each timelapse depict the typical changes in myocardial morphology seen over time in wt (A), mildly affected *ref* mutant (C) and severely affected *ref* mutant (E) embryos. (B,D,F) Tracks show the movements of the innermost cardiomyocytes in these embryos over the course of a ~2 h timelapse. Cell tracks are colored from blue to red, indicating the location of each cell from the beginning to the end of its trajectory. See also Videos S1-S3. Scale bars: 60  $\mu\text{m}$ .

**(G-L)** Quantitative analysis of cardiomyocyte movements. 168 and 137 cells were analyzed from 8 wt and 6 *ref* mutant embryos, respectively. Graphs depict the average speed of individual cells (G, distance/time), the average efficiency index of individual cells (H, displacement/distance), the average velocity (displacement/time) of individual cells along the anterior-posterior axis (I) and along the medial-lateral axis (J), the average medial-lateral velocity per embryo (K), and the direction of the overall trajectory of individual cells (L). Dots in (J) are colored to depict the embryo to which they belong, and the same color scheme is used in (K). In (L), individual cells are grouped into 10 bins based on their net direction of movement; length of each radial bar represents the number of cells in each bin. The velocity along the medial-lateral axis (J,K) and the direction of cell trajectories (L) were significantly altered in *ref* mutants, indicating the misdirection of *ref* mutant cardiomyocytes and implicating *pdgfra* in steering

the medial direction of cardiomyocyte movement. Error bars represent the standard deviation; p values were determined using Student's T-test.

**Figure 7. *pdgfaa* is expressed in the anterior endoderm, medially adjacent to the ALPM.**

**(A-G)** Fluorescent in situ hybridization and immunofluorescence compare the expression of *pdgfaa* (magenta) and *Tg(sox17:egfp)* (green) in wt embryos at 13 s. (A-C) Dorsal views, anterior to the top, of a three-dimensional reconstruction show that *pdgfaa* is expressed in bilateral domains of the anterior endoderm, near the lateral edges of the endodermal sheet. Expression of *pdgfaa* is also evident in cranial rhombomeres. (D-F) A coronal (XY) slice of the same embryo demonstrates the overlap between *pdgfaa* and *Tg(sox17:egfp)* expression. (G) A sagittal (ZY) slice of the same embryo provides a lateral view.

**(H-J)** Transverse cryosections compare the expression of *pdgfaa* (blue) and the expression of *Tg(sox17:egfp)* (green) in wt embryos at 13 s, showing that *pdgfaa* is expressed in lateral domains of the endodermal sheet.

**(K-P)** Comparison of *hand2* (green) and *pdgfaa* (red) expression patterns demonstrates that *pdgfaa* is expressed medially adjacent to the domains of *hand2* expression in the ALPM. (K-M) Three-dimensional confocal reconstructions of dorsal views, anterior to the top. (N-P) Single transverse (XZ) slices from (K-M), respectively.

**(Q-S)** Dorsal views, anterior to the top, display the expression of *myl7* at 22 s in nontransgenic (Q) or *Tg(hsp70l:pdgfaa-2A-mCherry)* (R,S) embryos, following heat shock at the tailbud stage. Ectopic expression of *pdgfaa* causes cardiac fusion defects (defects seen in 23/34 transgenic embryos, compared to 3/36 nontransgenic siblings). Scale bars: 60  $\mu$ m.

## SUPPLEMENTARY VIDEO LEGENDS

### **Supplementary Video S1. Cardiomyocytes in a wild-type embryo undergo medially directed movement during cardiac fusion.**

**(A,B)** Representative timelapse movie (A) and associated tracks (B) of cardiomyocyte movement occurring during cardiac fusion in a wild-type embryo carrying the *Tg(myl7:egfp)* transgene. (A) Movie of drift-corrected three-dimensional reconstructions of 30 confocal slices taken at ~4 min intervals for ~2 h, starting when eGFP could first be detected in the ALPM. (B) The movements of individual cardiomyocytes at the innermost region of the ALPM were tracked (dots, B) at each time point. Their positions over the previous 80 min are depicted as connected colored tracks (blue-to-red, beginning-to-end). Blank frames indicate brief pauses in acquisition for refocusing. Arrows indicate initial starting position of cardiomyocytes. Asterisks indicate GFP<sup>+</sup> cells that are not cardiomyocytes.

Scale bar: 40  $\mu$ m.

**Supplementary Video S2. Not all cardiomyocytes in a mildly affected *ref* mutant embryo undergo medially directed movement during cardiac fusion.**

**(A,B)** Representative timelapse movie (A) and associated tracks (B) of cardiomyocyte movement in a mildly affected *ref* mutant embryo carrying the *Tg(myl7:egfp)* transgene. Images were acquired as described for Video S1; however, drift correction was not applied to this movie and thus its tracks were not included in further quantitative analysis. In mildly affected *ref* mutant embryos, posterior cardiomyocytes display sufficient medial movement to fuse at the midline, while anterior cardiomyocytes do not. Arrows indicate initial starting position of cardiomyocytes. Asterisks indicate GFP<sup>+</sup> cells that are not cardiomyocytes.

Scale bar: 40  $\mu$ m.



**Supplementary Video S3. Cardiomyocytes in a severely affected *ref* mutant embryo fail to display medially directed movement during cardiac fusion.**

**(A,B)** Representative timelapse movie (A) and associated tracks (B) of cardiomyocyte movement in a severely affected *ref* mutant embryo carrying the *Tg(myl7:egfp)* transgene. Images were acquired as described for Video S1, with drift correction. In severely affected *ref* mutant embryos, none of the cardiomyocytes display measurable medial movement. Arrows indicate initial starting position of cardiomyocytes. Blank frames indicate brief pauses in acquisition for refocusing. Asterisks indicate GFP<sup>+</sup> cells that are not cardiomyocytes.

Scale bar: 40  $\mu$ m.

## REFERENCES

- Aleksandrova, A., Czirok, A., Kosa, E., Galkin, O., Chevront, T. J. and Rongish, B. J.** (2015). The endoderm and myocardium join forces to drive early heart tube assembly. *Dev Biol* **404**, 40-54.
- Alexander, J., Rothenberg, M., Henry, G. L. and Stainier, D. Y.** (1999). casanova plays an early and essential role in endoderm formation in zebrafish. *Dev Biol* **215**, 343-357.
- Alexander, J., Stainier, D. Y. and Yelon, D.** (1998). Screening mosaic F1 females for mutations affecting zebrafish heart induction and patterning. *Dev Genet* **22**, 288-299.
- Andrae, J., Gallini, R. and Betsholtz, C.** (2008). Role of platelet-derived growth factors in physiology and medicine. *Genes Dev* **22**, 1276-1312.
- Artus, J., Kang, M., Cohen-Tannoudji, M. and Hadjantonakis, A. K.** (2013). PDGF signaling is required for primitive endoderm cell survival in the inner cell mass of the mouse blastocyst. *Stem Cells* **31**, 1932-1941.
- Artus, J., Panthier, J. J. and Hadjantonakis, A. K.** (2010). A role for PDGF signaling in expansion of the extra-embryonic endoderm lineage of the mouse blastocyst. *Development* **137**, 3361-3372.

- Ataliotis, P., Symes, K., Chou, M. M., Ho, L. and Mercola, M. (1995).** PDGF signalling is required for gastrulation of *Xenopus laevis*. *Development* **121**, 3099-3110.
- Auman, H. J., Coleman, H., Riley, H. E., Olale, F., Tsai, H. J. and Yelon, D. (2007).** Functional modulation of cardiac form through regionally confined cell shape changes. *PLoS Biol* **5**, e53.
- Bax, N. A., Bleyl, S. B., Gallini, R., Wisse, L. J., Hunter, J., Van Oorschot, A. A., Mahtab, E. A., Lie-Venema, H., Goumans, M. J., Betsholtz, C. and Gittenberger-de Groot, A. C. (2010).** Cardiac malformations in Pdgfralpha mutant embryos are associated with increased expression of WT1 and Nkx2.5 in the second heart field. *Dev Dyn* **239**, 2307-2317.
- Bleyl, S. B., Saijoh, Y., Bax, N. A., Gittenberger-de Groot, A. C., Wisse, L. J., Chapman, S. C., Hunter, J., Shiratori, H., Hamada, H., Yamada, S., Shiota, K., Klewer, S. E., Leppert, M. F. and Schoenwolf, G. C. (2010).** Dysregulation of the PDGFRA gene causes inflow tract anomalies including TAPVR: integrating evidence from human genetics and model organisms. *Hum Mol Genet* **19**, 1286-1301.
- Brend, T. and Holley, S. A. (2009).** Zebrafish whole mount high-resolution double fluorescent in situ hybridization. *J Vis Exp.* **25**, e1229.

**Briggs, L. E., Kakarla, J. and Wessels, A.** (2012). The pathogenesis of atrial and atrioventricular septal defects with special emphasis on the role of the dorsal mesenchymal protrusion. *Differentiation* **84**, 117-130.

**Bruneau, B. G.** (2008). The developmental genetics of congenital heart disease. *Nature* **451**, 943-948.

**Chong, J. J., Chandrakanthan, V., Xaymardan, M., Asli, N. S., Li, J., Ahmed, I., Heffernan, C., Menon, M. K., Scarlett, C. J., Rashidianfar, A., Biben, C., Zoellner, H., Colvin, E. K., Pimanda, J. E., Biankin, A. V., Zhou, B., Pu, W. T., Prall, O. W. and Harvey, R. P.** (2011). Adult cardiac-resident MSC-like stem cells with a proepicardial origin. *Cell Stem Cell* **9**, 527-540.

**Cui, C., Chevront, T. J., Lansford, R. D., Moreno-Rodriguez, R. A., Schultheiss, T. M. and Rongish, B. J.** (2009). Dynamic positional fate map of the primary heart-forming region. *Dev Biol* **332**, 212-222.

**Damm, E. W. and Winklbauer, R.** (2011). PDGF-A controls mesoderm cell orientation and radial intercalation during *Xenopus* gastrulation. *Development* **138**, 565-575.

**Dehaan, R. L.** (1963). Migration patterns of the precardiac mesoderm in the early chick embryo. *Exp Cell Res* **29**, 544-560.

**Ding, H., Wu, X., Bostrom, H., Kim, I., Wong, N., Tsoi, B., O'Rourke, M., Koh, G. Y., Soriano, P., Betsholtz, C., Hart, T. C., Marazita, M. L., Field, L. L., Tam, P. P. and Nagy, A. (2004).** A specific requirement for PDGF-C in palate formation and PDGFR-alpha signaling. *Nat Genet* **36**, 1111-1116.

**Duchek, P., Somogyi, K., Jekely, G., Beccari, S. and Rorth, P. (2001).**  
Guidance of cell migration by the Drosophila PDGF/VEGF receptor. *Cell* **107**, 17-26.

**Eberhart, J. K., He, X., Swartz, M. E., Yan, Y. L., Song, H., Boling, T. C., Kunerth, A. K., Walker, M. B., Kimmel, C. B. and Postlethwait, J. H. (2008).** MicroRNA Mirn140 modulates Pdgf signaling during palatogenesis. *Nat Genet* **40**, 290-298.

**Evans, S. M., Yelon, D., Conlon, F. L. and Kirby, M. L. (2010).** Myocardial lineage development. *Circ Res* **107**, 1428-1444.

**Fish, J. E., Wythe, J. D., Xiao, T., Bruneau, B. G., Stainier, D. Y., Srivastava, D. and Woo, S. (2011).** A Slit/miR-218/Robo regulatory loop is required during heart tube formation in zebrafish. *Development* **138**, 1409-1419.

**Fisher, S., Grice, E. A., Vinton, R. M., Bessling, S. L., Urasaki, A., Kawakami, K. and McCallion, A. S. (2006).** Evaluating the biological relevance of

- putative enhancers using Tol2 transposon-mediated transgenesis in zebrafish. *Nat Protoc* **1**, 1297-1305.
- Friedl, P. and Gilmour, D.** (2009). Collective cell migration in morphogenesis, regeneration and cancer. *Nat Rev Mol Cell Biol* **10**, 445-457.
- Garavito-Aguilar, Z. V., Riley, H. E. and Yelon, D.** (2010). Hand2 ensures an appropriate environment for cardiac fusion by limiting Fibronectin function. *Development* **137**, 3215-3220.
- Garlena, R. A., Lennox, A. L., Baker, L. R., Parsons, T. E., Weinberg, S. M. and Stronach, B. E.** (2015). The receptor tyrosine kinase Pvr promotes tissue closure by coordinating corpse removal and epidermal zippering. *Development* **142**, 3403-3415.
- Grüneberg, H. and Truslove, G. M.** (1960). Two closely linked genes in the mouse. *Genetics Research* **1**, 69-90.
- Haack, T., Schneider, M., Schwendele, B. and Renault, A. D.** (2014). *Drosophila* heart cell movement to the midline occurs through both cell autonomous migration and dorsal closure. *Dev Biol* **396**, 169-182.

**Hamilton, T. G., Klinghoffer, R. A., Corrin, P. D. and Soriano, P. (2003).**

Evolutionary divergence of platelet-derived growth factor alpha receptor signaling mechanisms. *Mol Cell Biol* **23**, 4013-4025.

**Hesselson, D., Anderson, R. M., Beinat, M. and Stainier, D. Y. (2009).** Distinct

populations of quiescent and proliferative pancreatic beta-cells identified by H2Tcre mediated labeling. *Proc Natl Acad Sci U S A* **106**, 14896-14901.

**Hoch, R. V. and Soriano, P. (2003).** Roles of PDGF in animal development.

*Development* **130**, 4769-4784.

**Holtzman, N. G., Schoenebeck, J. J., Tsai, H. J. and Yelon, D. (2007).**

Endocardium is necessary for cardiomyocyte movement during heart tube assembly. *Development* **134**, 2379-2386.

**Huang, C. J., Tu, C. T., Hsiao, C. D., Hsieh, F. J. and Tsai, H. J. (2003).** Germ-

line transmission of a myocardium-specific GFP transgene reveals critical regulatory elements in the cardiac myosin light chain 2 promoter of zebrafish. *Dev Dyn* **228**, 30-40.

**Kawahara, A., Nishi, T., Hisano, Y., Fukui, H., Yamaguchi, A. and Mochizuki,**

**N. (2009).** The sphingolipid transporter spns2 functions in migration of zebrafish myocardial precursors. *Science* **323**, 524-527.

**Kikuchi, Y., Agathon, A., Alexander, J., Thisse, C., Waldron, S., Yelon, D.,**

**Thisse, B. and Stainier, D. Y.** (2001). casanova encodes a novel Sox-related protein necessary and sufficient for early endoderm formation in zebrafish. *Genes Dev* **15**, 1493-1505.

**Kim, J., Wu, Q., Zhang, Y., Wiens, K. M., Huang, Y., Rubin, N., Shimada, H.,**

**Handin, R. I., Chao, M. Y., Tuan, T. L., Starnes, V. A. and Lien, C. L.** (2010). PDGF signaling is required for epicardial function and blood vessel formation in regenerating zebrafish hearts. *Proc Natl Acad Sci U S A* **107**, 17206-17210.

**Kimmel, C. B., Miller, C. T., Kruze, G., Ullmann, B., BreMiller, R. A., Larison,**

**K. D. and Snyder, H. C.** (1998). The shaping of pharyngeal cartilages during early development of the zebrafish. *Dev Biol* **203**, 245-263.

**Kupperman, E., An, S., Osborne, N., Waldron, S. and Stainier, D. Y.** (2000). A

sphingosine-1-phosphate receptor regulates cell migration during vertebrate heart development. *Nature* **406**, 192-195.

**Kwan, K. M., Fujimoto, E., Grabher, C., Mangum, B. D., Hardy, M. E.,**

**Campbell, D. S., Parant, J. M., Yost, H. J., Kanki, J. P. and Chien, C. B.** (2007). The Tol2kit: a multisite gateway-based construction kit for Tol2 transposon transgenesis constructs. *Dev Dyn* **236**, 3088-3099.



**Li, S., Zhou, D., Lu, M. M. and Morrisey, E. E.** (2004). Advanced cardiac morphogenesis does not require heart tube fusion. *Science* **305**, 1619-1622.

**Linask, K. K.** (1992). N-cadherin localization in early heart development and polar expression of Na<sup>+</sup>,K(+)-ATPase, and integrin during pericardial coelom formation and epithelialization of the differentiating myocardium. *Dev Biol* **151**, 213-224.

**Lindahl, P., Hellstrom, M., Kalen, M., Karlsson, L., Pekny, M., Pekna, M., Soriano, P. and Betsholtz, C.** (1998). Paracrine PDGF-B/PDGF-Rbeta signaling controls mesangial cell development in kidney glomeruli. *Development* **125**, 3313-3322.

**Liu, L., Chong, S. W., Balasubramaniyan, N. V., Korzh, V. and Ge, R.** (2002). Platelet-derived growth factor receptor alpha (pdgfr-alpha) gene in zebrafish embryonic development. *Mech Dev* **116**, 227-230.

**Manasek, F. J.** (1968). Embryonic development of the heart. I. A light and electron microscopic study of myocardial development in the early chick embryo. *J Morphol* **125**, 329-365.

- Mendelson, K., Lan, Y., Hla, T. and Evans, T. (2015).** Maternal or zygotic sphingosine kinase is required to regulate zebrafish cardiogenesis. *Dev Dyn* **244**, 948-954.
- Mercola, M., Wang, C. Y., Kelly, J., Brownlee, C., Jackson-Grusby, L., Stiles, C. and Bowen-Pope, D. (1990).** Selective expression of PDGF A and its receptor during early mouse embryogenesis. *Dev Biol* **138**, 114-122.
- Mizoguchi, T., Verkade, H., Heath, J. K., Kuroiwa, A. and Kikuchi, Y. (2008).** Sdf1/Cxcr4 signaling controls the dorsal migration of endodermal cells during zebrafish gastrulation. *Development* **135**, 2521-2529.
- Molkentin, J. D., Lin, Q., Duncan, S. A. and Olson, E. N. (1997).** Requirement of the transcription factor GATA4 for heart tube formation and ventral morphogenesis. *Genes Dev* **11**, 1061-1072.
- Morrison-Graham, K., Schatteman, G. C., Bork, T., Bowen-Pope, D. F. and Weston, J. A. (1992).** A PDGF receptor mutation in the mouse (Patch) perturbs the development of a non-neuronal subset of neural crest-derived cells. *Development* **115**, 133-142.
- Nagel, M., Tahinci, E., Symes, K. and Winklbauer, R. (2004).** Guidance of mesoderm cell migration in the *Xenopus* gastrula requires PDGF signaling. *Development* **131**, 2727-2736.

**Neeb, Z., Lajiness, J. D., Bolanis, E. and Conway, S. J.** (2013). Cardiac outflow tract anomalies. *Wiley Interdiscip Rev Dev Biol* **2**, 499-530.

**Orr-Urtreger, A., Bedford, M. T., Do, M. S., Eisenbach, L. and Lonai, P.** (1992). Developmental expression of the alpha receptor for platelet-derived growth factor, which is deleted in the embryonic lethal Patch mutation. *Development* **115**, 289-303.

**Orr-Urtreger, A. and Lonai, P.** (1992). Platelet-derived growth factor-A and its receptor are expressed in separate, but adjacent cell layers of the mouse embryo. *Development* **115**, 1045-1058.

**Osborne, N., Brand-Arzamendi, K., Ober, E. A., Jin, S. W., Verkade, H., Holtzman, N. G., Yelon, D. and Stainier, D. Y.** (2008). The spinster homolog, two of hearts, is required for sphingosine 1-phosphate signaling in zebrafish. *Curr Biol* **18**, 1882-1888.

**Palmieri, S. L., Payne, J., Stiles, C. D., Biggers, J. D. and Mercola, M.** (1992). Expression of mouse PDGF-A and PDGF alpha-receptor genes during pre- and post-implantation development: evidence for a developmental shift from an autocrine to a paracrine mode of action. *Mech Dev* **39**, 181-191.

**Prall, O. W., Menon, M. K., Solloway, M. J., Watanabe, Y., Zaffran, S., Bajolle, F., Biben, C., McBride, J. J., Robertson, B. R., Chaulet, H., Stennard, F. A., Wise, N., Schaft, D., Wolstein, O., Furtado, M. B., Shiratori, H., Chien, K. R., Hamada, H., Black, B. L., Saga, Y., Robertson, E. J., Buckingham, M. E. and Harvey, R. P. (2007).** An Nkx2-5/Bmp2/Smad1 negative feedback loop controls heart progenitor specification and proliferation. *Cell* **128**, 947-959.

**Ragkousi, K., Beh, J., Sweeney, S., Starobinska, E. and Davidson, B. (2011).** A single GATA factor plays discrete, lineage specific roles in ascidian heart development. *Dev Biol* **352**, 154-163.

**Richarte, A. M., Mead, H. B. and Tallquist, M. D. (2007).** Cooperation between the PDGF receptors in cardiac neural crest cell migration. *Dev Biol* **306**, 785-796.

**Roebroek, A. J., Umans, L., Pauli, I. G., Robertson, E. J., van Leuven, F., Van de Ven, W. J. and Constam, D. B. (1998).** Failure of ventral closure and axial rotation in embryos lacking the proprotein convertase Furin. *Development* **125**, 4863-4876.

**Roman, B. L., Pham, V. N., Lawson, N. D., Kulik, M., Childs, S., Lekven, A. C., Garrity, D. M., Moon, R. T., Fishman, M. C., Lechleider, R. J. and**

- Weinstein, B. M.** (2002). Disruption of *acvr1* increases endothelial cell number in zebrafish cranial vessels. *Development* **129**, 3009-3019.
- Samsa, L. A., Yang, B. and Liu, J.** (2013). Embryonic cardiac chamber maturation: Trabeculation, conduction, and cardiomyocyte proliferation. *Am J Med Genet C Semin Med Genet* **163C**, 157-168.
- Scarpa, E. and Mayor, R.** (2016). Collective cell migration in development. *J Cell Biol* **212**, 143-155.
- Schatteman, G. C., Motley, S. T., Effmann, E. L. and Bowen-Pope, D. F.** (1995). Platelet-derived growth factor receptor alpha subunit deleted Patch mouse exhibits severe cardiovascular dysmorphogenesis. *Teratology* **51**, 351-366.
- Schoenebeck, J. J., Keegan, B. R. and Yelon, D.** (2007). Vessel and blood specification override cardiac potential in anterior mesoderm. *Dev Cell* **13**, 254-267.
- Smith, C. L., Baek, S. T., Sung, C. Y. and Tallquist, M. D.** (2011). Epicardial-derived cell epithelial-to-mesenchymal transition and fate specification require PDGF receptor signaling. *Circ Res* **108**, e15-26.

**Soriano, P.** (1997). The PDGF alpha receptor is required for neural crest cell development and for normal patterning of the somites. *Development* **124**, 2691-2700.

**Stainier, D. Y., Lee, R. K. and Fishman, M. C.** (1993). Cardiovascular development in the zebrafish. I. Myocardial fate map and heart tube formation. *Development* **119**, 31-40.

**Tallquist, M. D. and Soriano, P.** (2003). Cell autonomous requirement for PDGFRalpha in populations of cranial and cardiac neural crest cells. *Development* **130**, 507-518.

**Trinh, L. A. and Stainier, D. Y.** (2004). Fibronectin regulates epithelial organization during myocardial migration in zebrafish. *Dev Cell* **6**, 371-382.

**Varner, V. D. and Taber, L. A.** (2012). Not just inductive: a crucial mechanical role for the endoderm during heart tube assembly. *Development* **139**, 1680-1690.

**Vincent, S. D. and Buckingham, M. E.** (2010). How to make a heart: the origin and regulation of cardiac progenitor cells. *Curr Top Dev Biol* **90**, 1-41.

**Wong, K. S., Rehn, K., Palencia-Desai, S., Kohli, V., Hunter, W., Uhl, J. D., Rost, M. S. and Sumanas, S.** (2012). Hedgehog signaling is required for

- differentiation of endocardial progenitors in zebrafish. *Dev Biol* **361**, 377-391.
- Xie, H., Ye, D., Sepich, D. and Lin, F.** (2016). S1pr2/Galpha13 signaling regulates the migration of endocardial precursors by controlling endoderm convergence. *Dev Biol* **414**, 228-243.
- Xu, X., Bringas, P., Jr., Soriano, P. and Chai, Y.** (2005). PDGFR-alpha signaling is critical for tooth cusp and palate morphogenesis. *Dev Dyn* **232**, 75-84.
- Yang, X., Chrisman, H. and Weijer, C. J.** (2008). PDGF signalling controls the migration of mesoderm cells during chick gastrulation by regulating N-cadherin expression. *Development* **135**, 3521-3530.
- Ye, D. and Lin, F.** (2013). S1pr2/Galpha13 signaling controls myocardial migration by regulating endoderm convergence. *Development* **140**, 789-799.
- Ye, D., Xie, H., Hu, B. and Lin, F.** (2015). Endoderm convergence controls subduction of the myocardial precursors during heart-tube formation. *Development* **142**, 2928-2940.

**Yelon, D., Horne, S. A. and Stainier, D. Y.** (1999). Restricted expression of cardiac myosin genes reveals regulated aspects of heart tube assembly in zebrafish. *Dev Biol* **214**, 23-37.

**Zeng, X. X. and Yelon, D.** (2014). Cadm4 restricts the production of cardiac outflow tract progenitor cells. *Cell Rep* **7**, 951-960.



# FIGURE 1

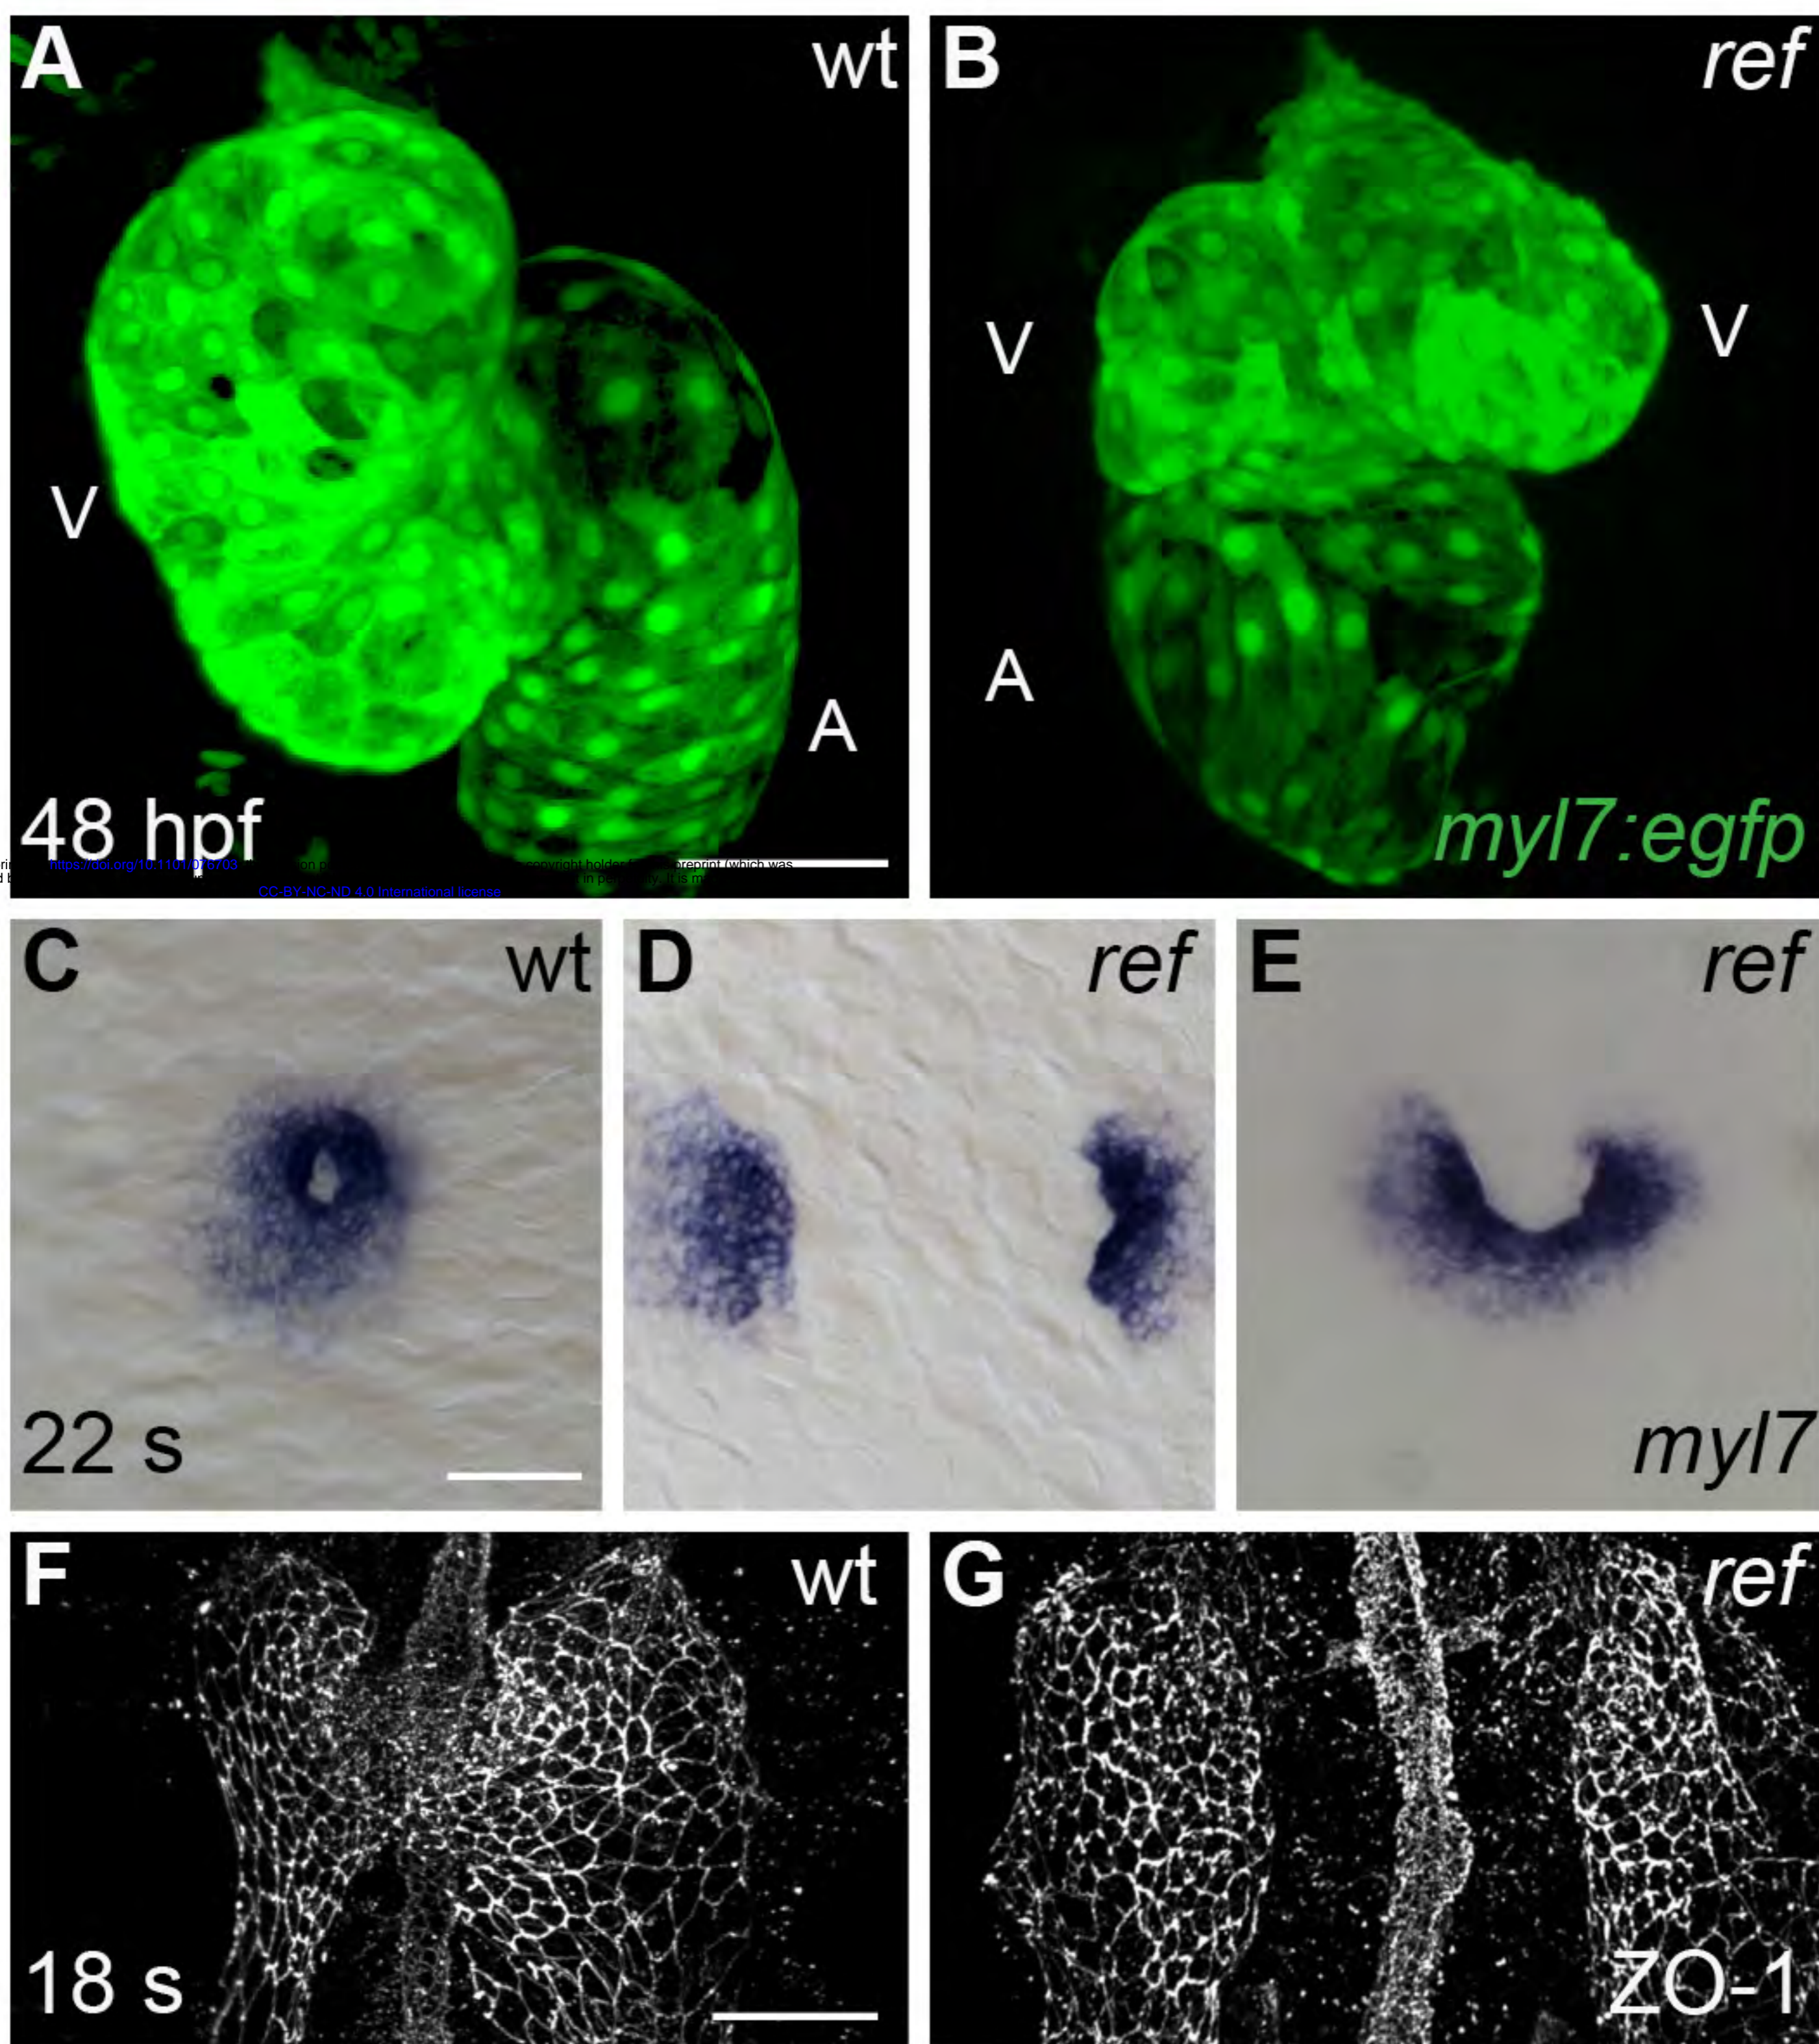

FIGURE 1 - FIGURE SUPPLEMENT 1

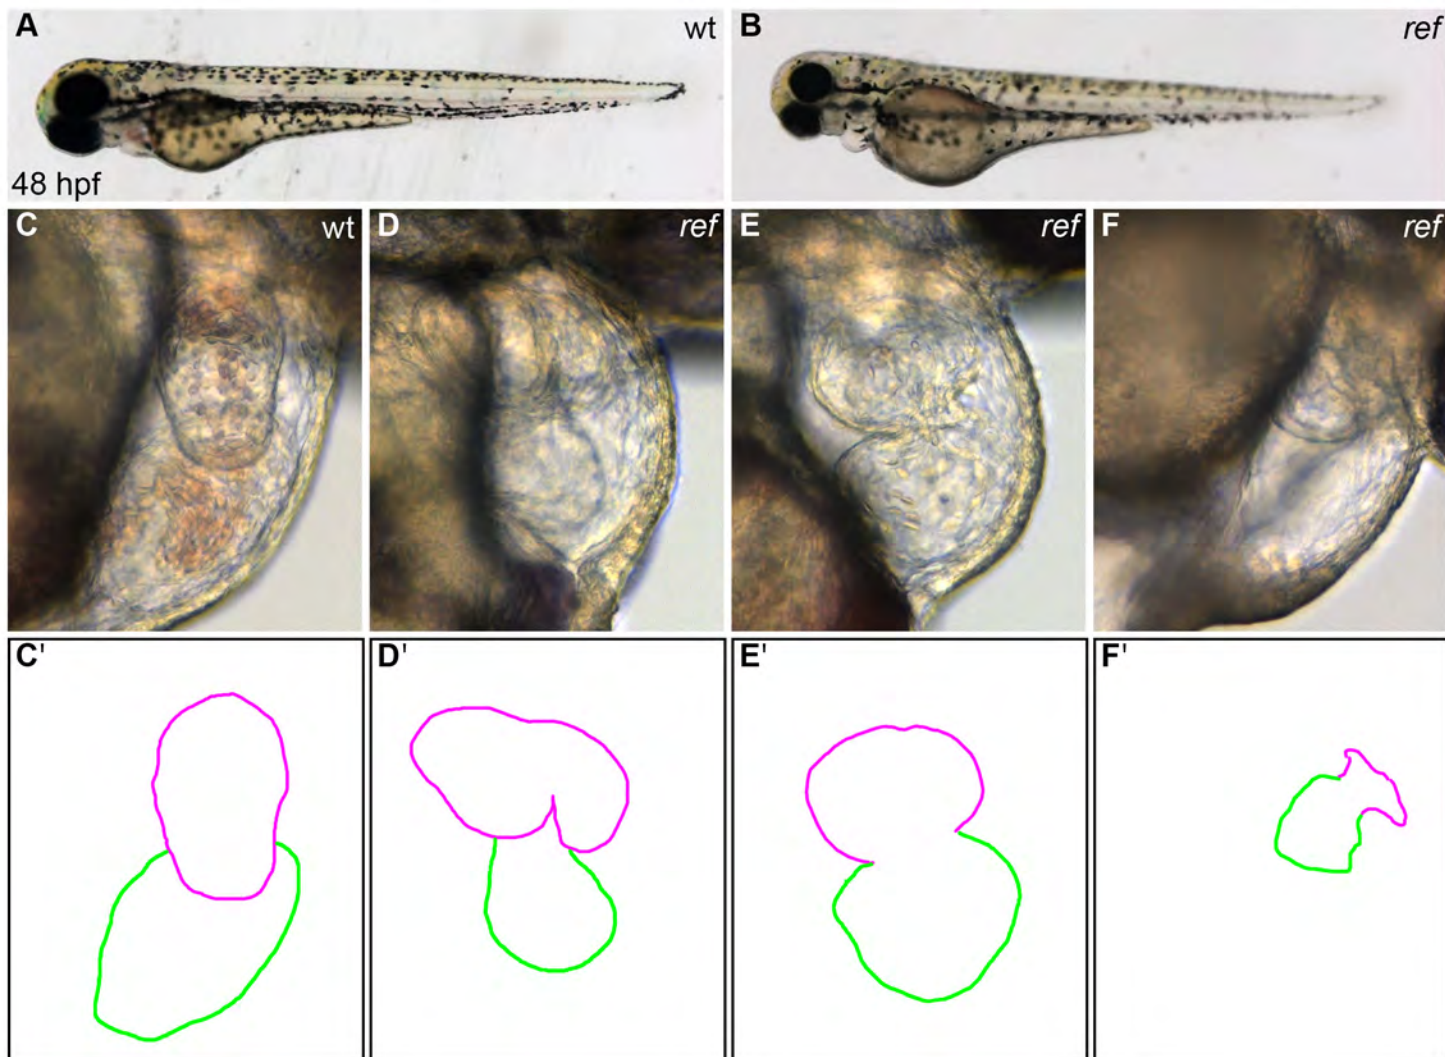

FIGURE 1 - FIGURE SUPPLEMENT 2

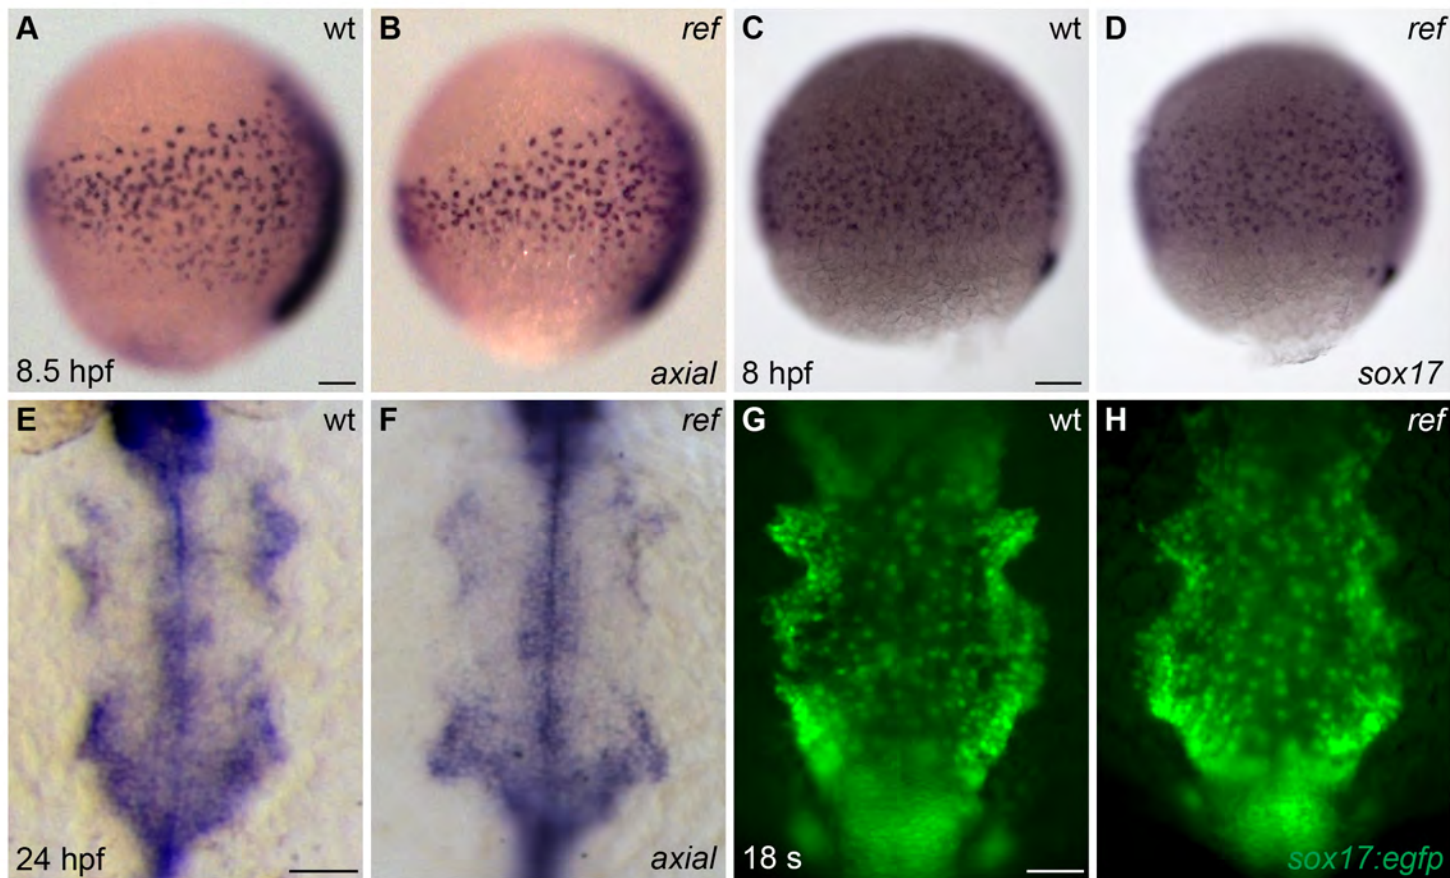

FIGURE 1 - FIGURE SUPPLEMENT 3

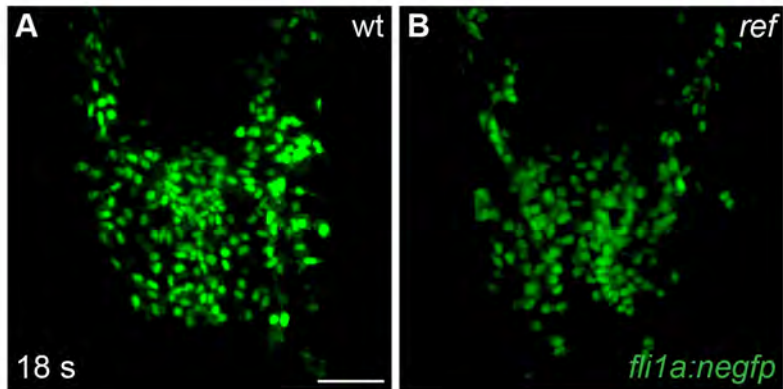

**FIGURE 2**

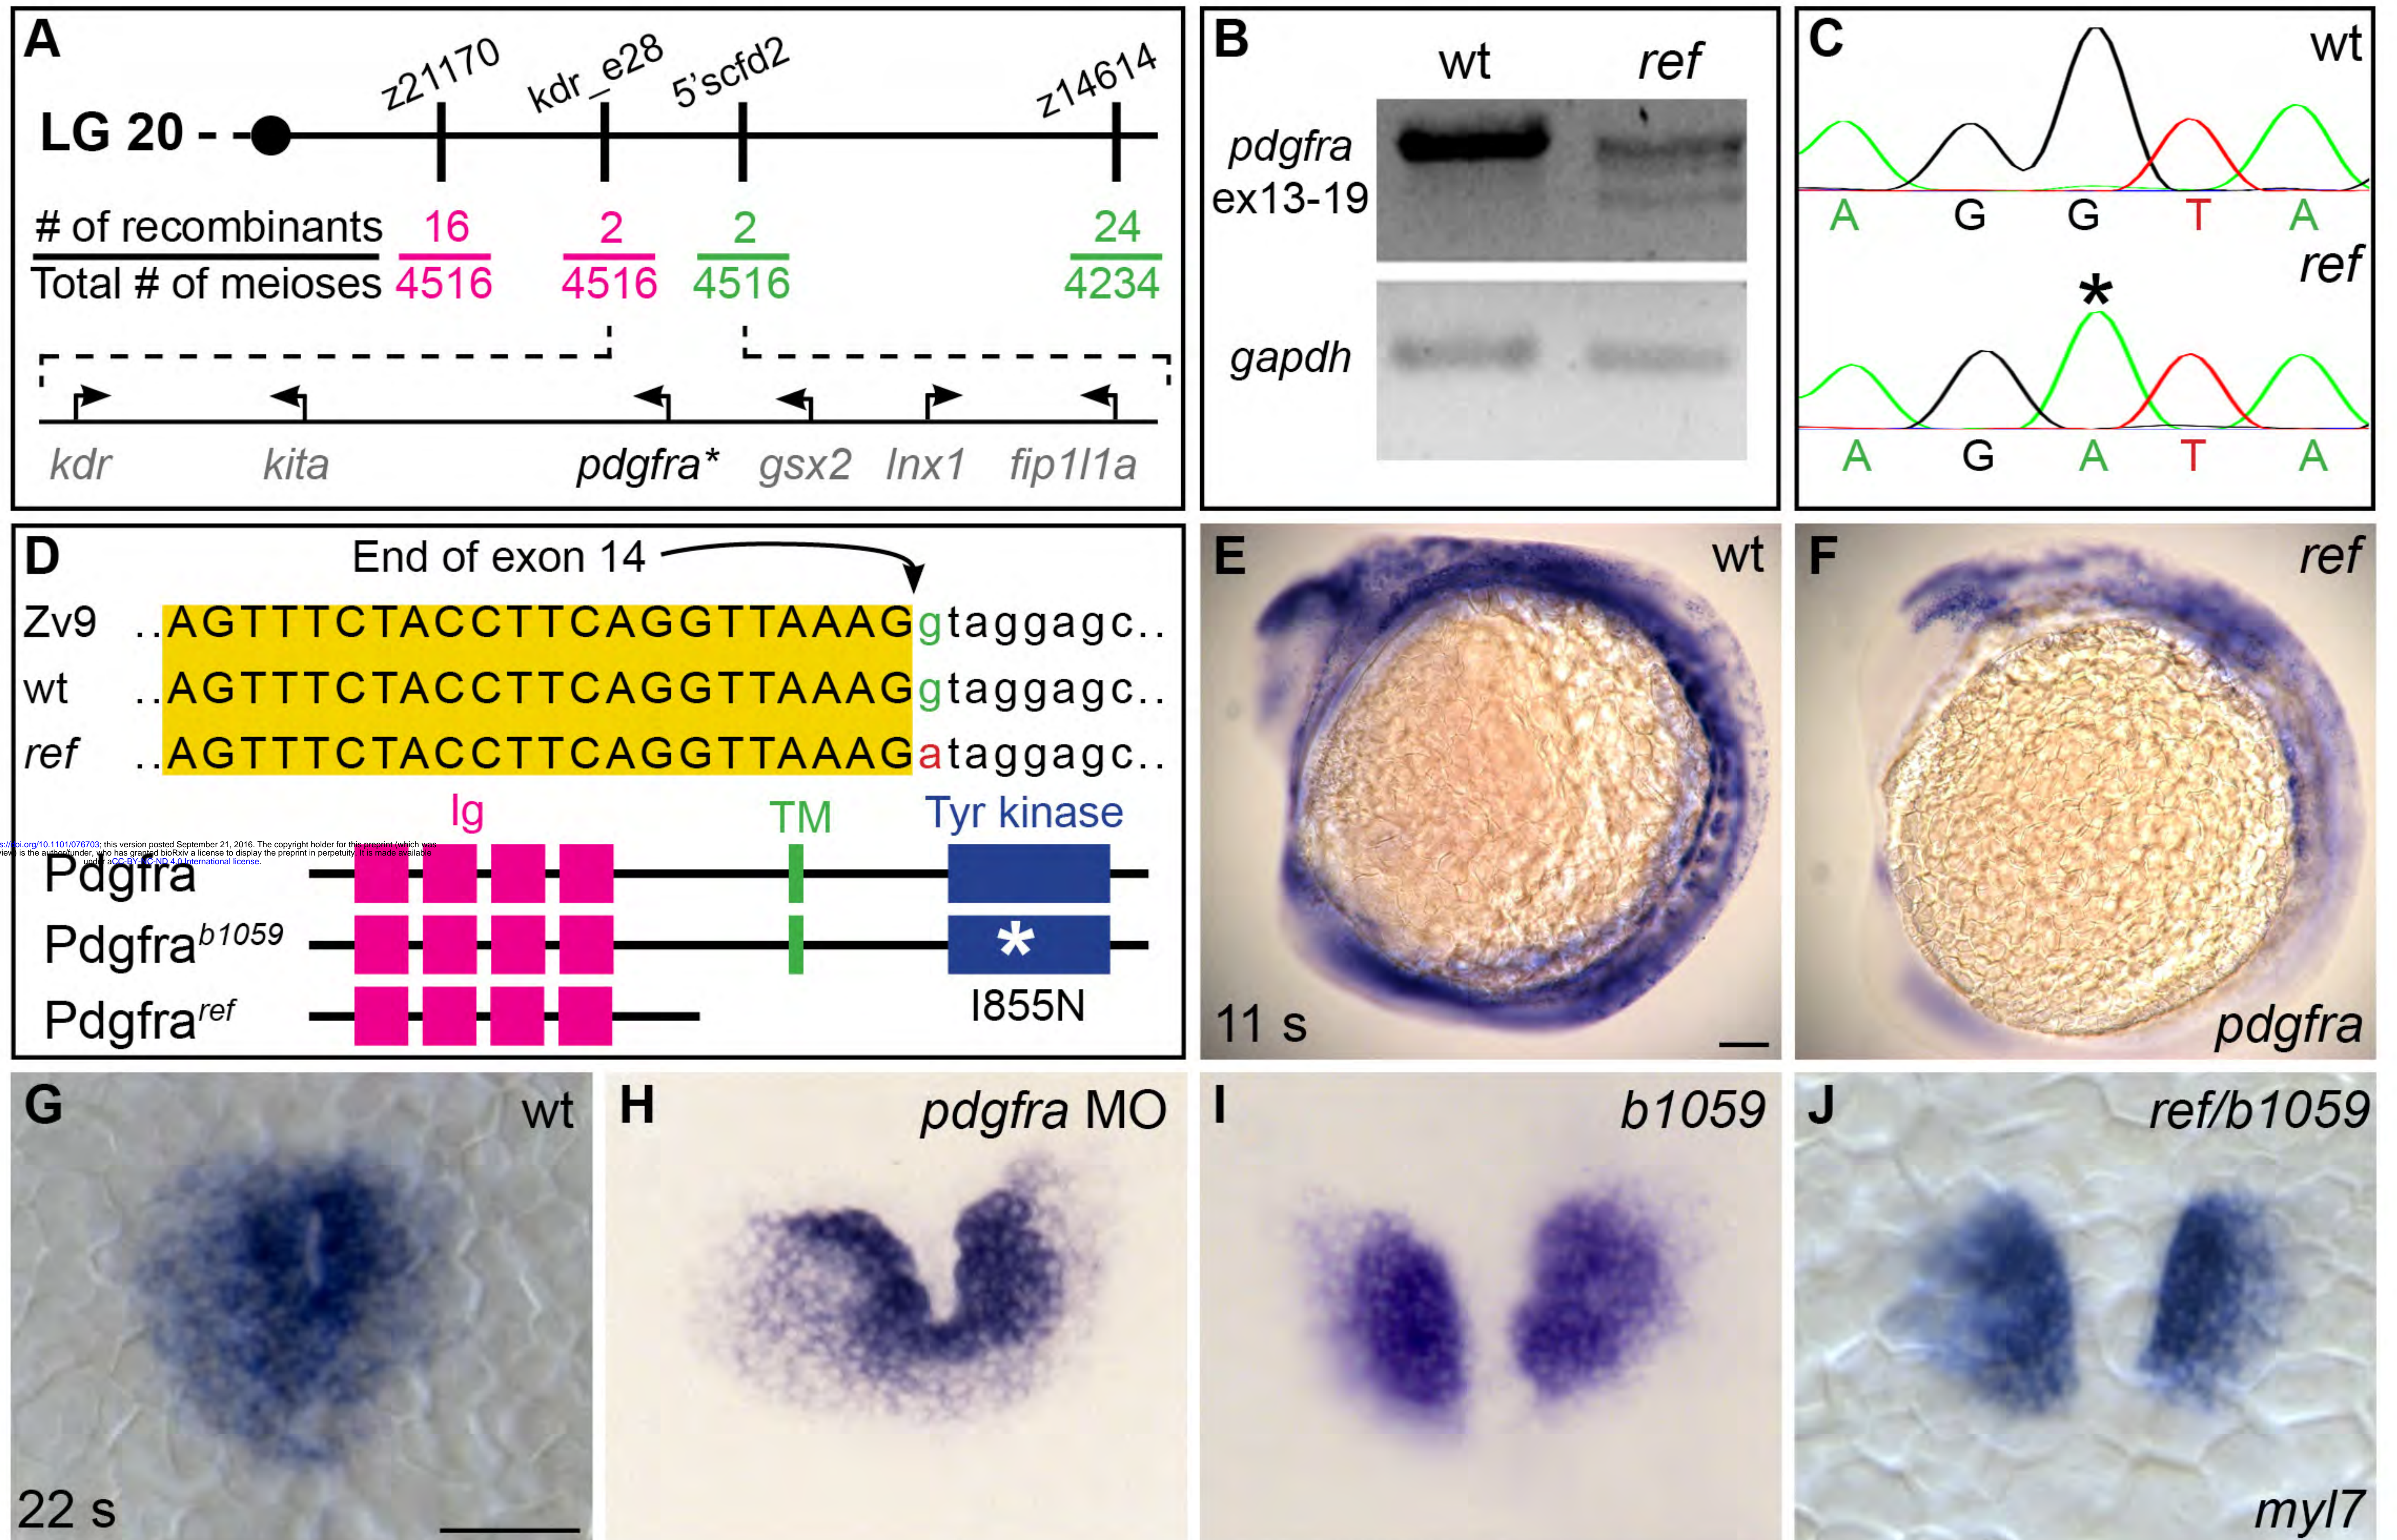

## FIGURE 2 – FIGURE SUPPLEMENT 1: Primers used to map recombinants

| <b>Marker</b> | <b>Forward primer</b>   | <b>Reverse primer</b> |
|---------------|-------------------------|-----------------------|
| 5'SCFD2       | CGCGTTACCAGAGAGACACA    | TTCTCGGCAGGATAAATTGG  |
| Z14614        | AAACACATGCACAATGGTAGAAA | CAGCAAGTTCAGCCAAAACA  |
| Z21170        | AAACATTGCTTTTGGCCACT    | CTCACTCCCCCACACTGTTT  |
| kdr_e28       | TATGATAACGCTCCGCCTCT    | CAGGGGAATGTCCACAAAAC  |

FIGURE 2 - FIGURE SUPPLEMENT 2

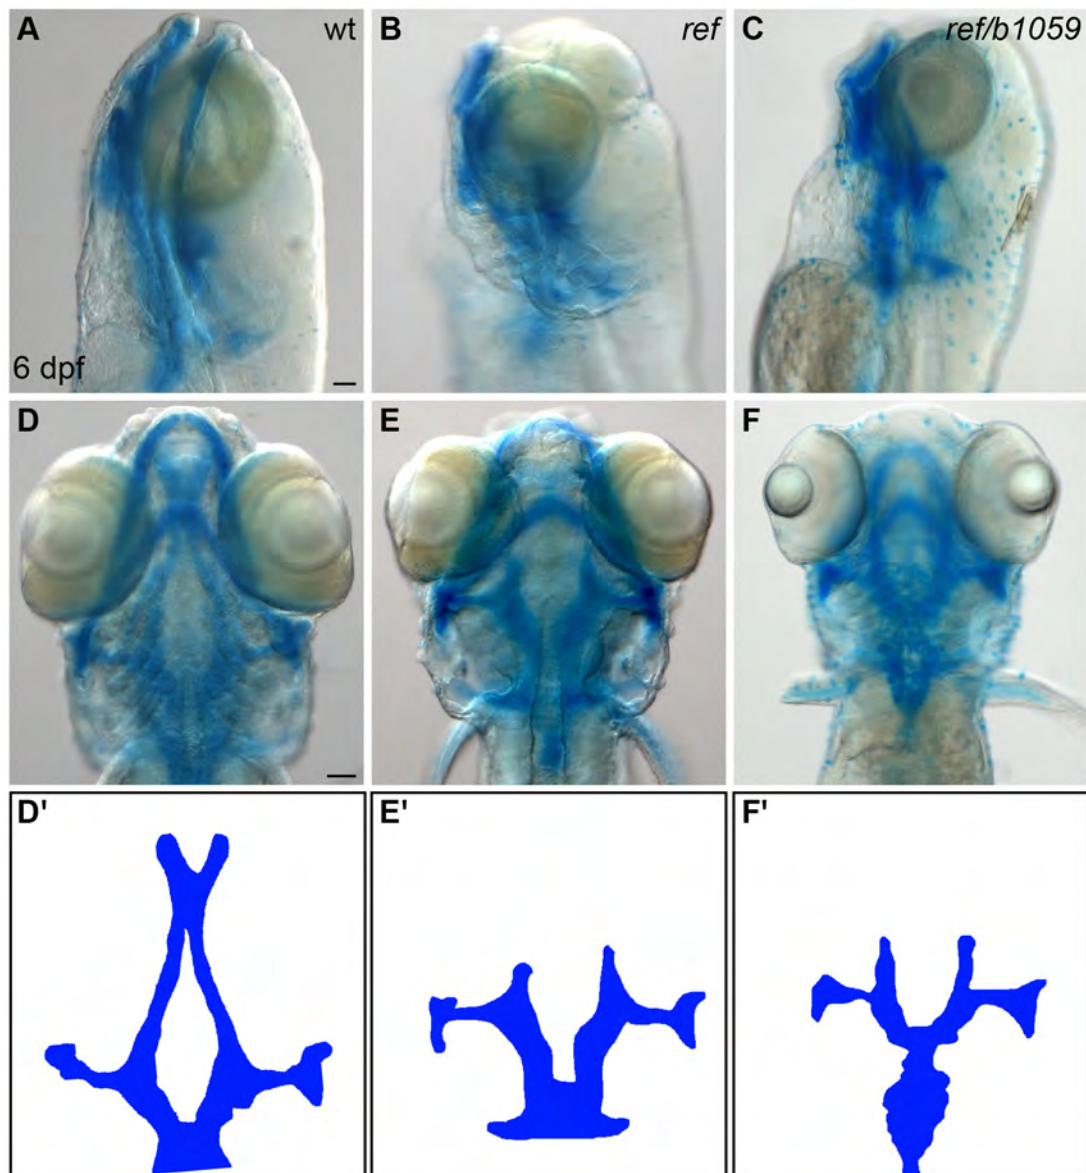

**FIGURE 3**

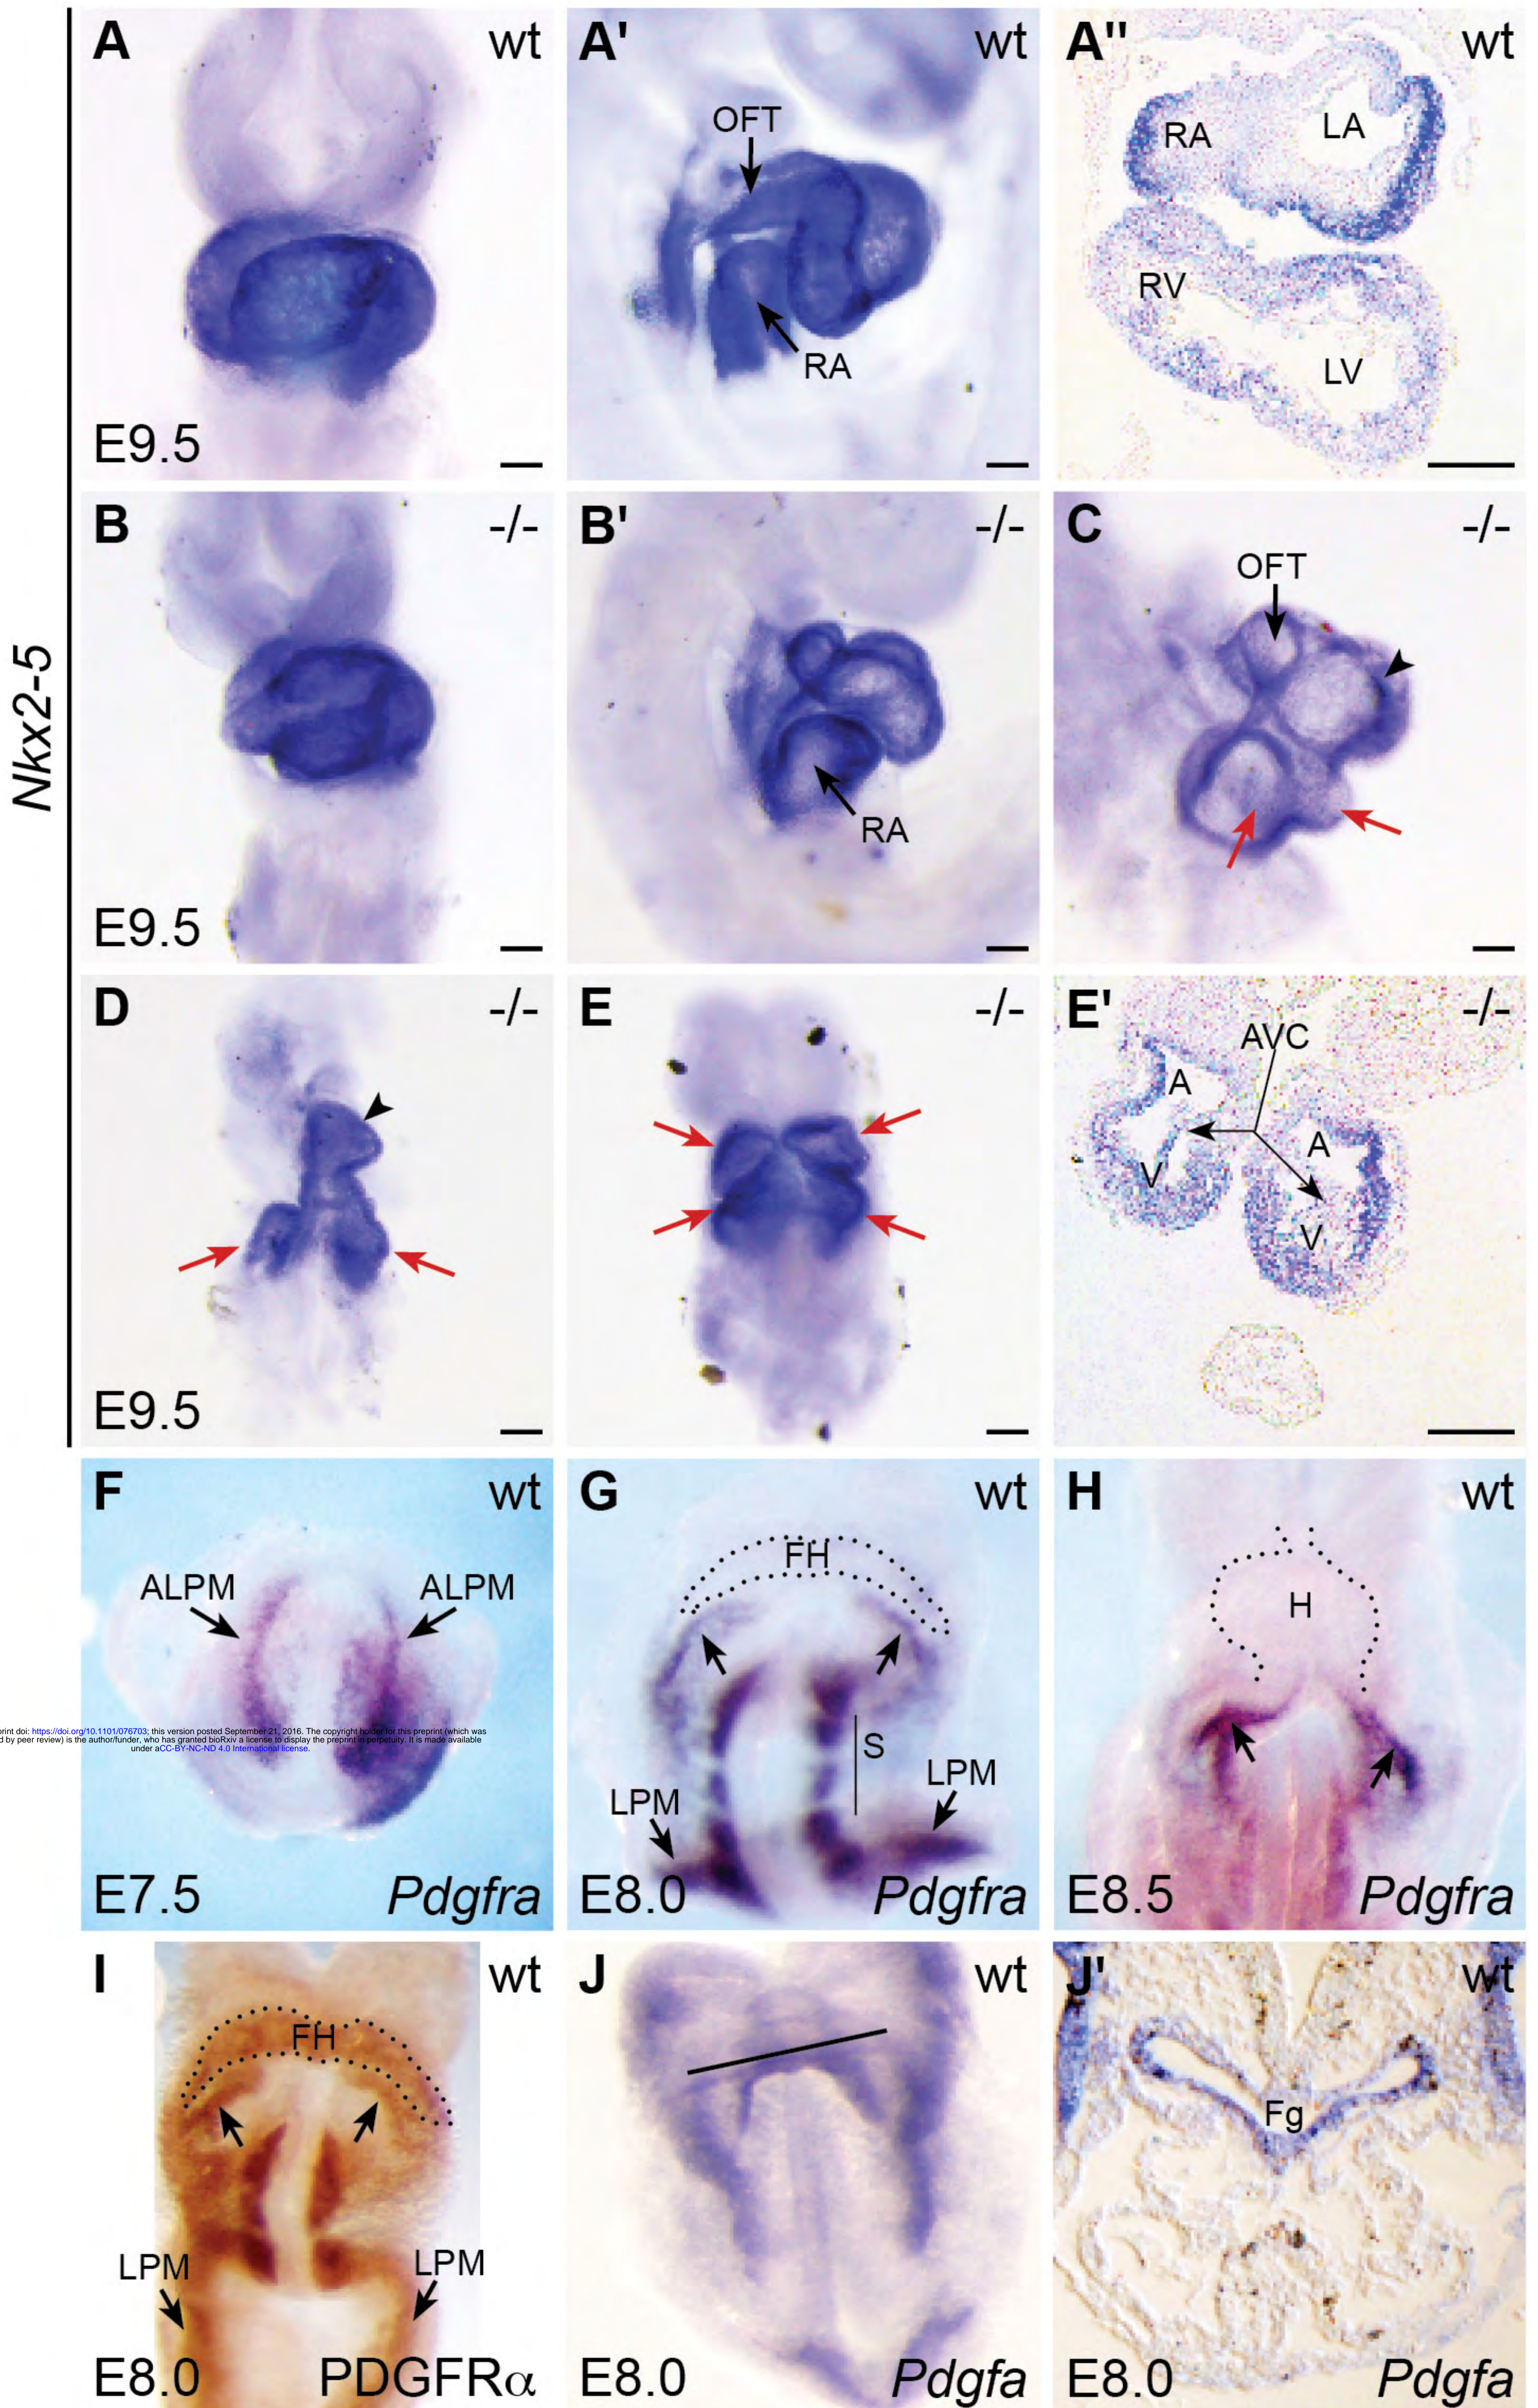



**FIGURE 4**

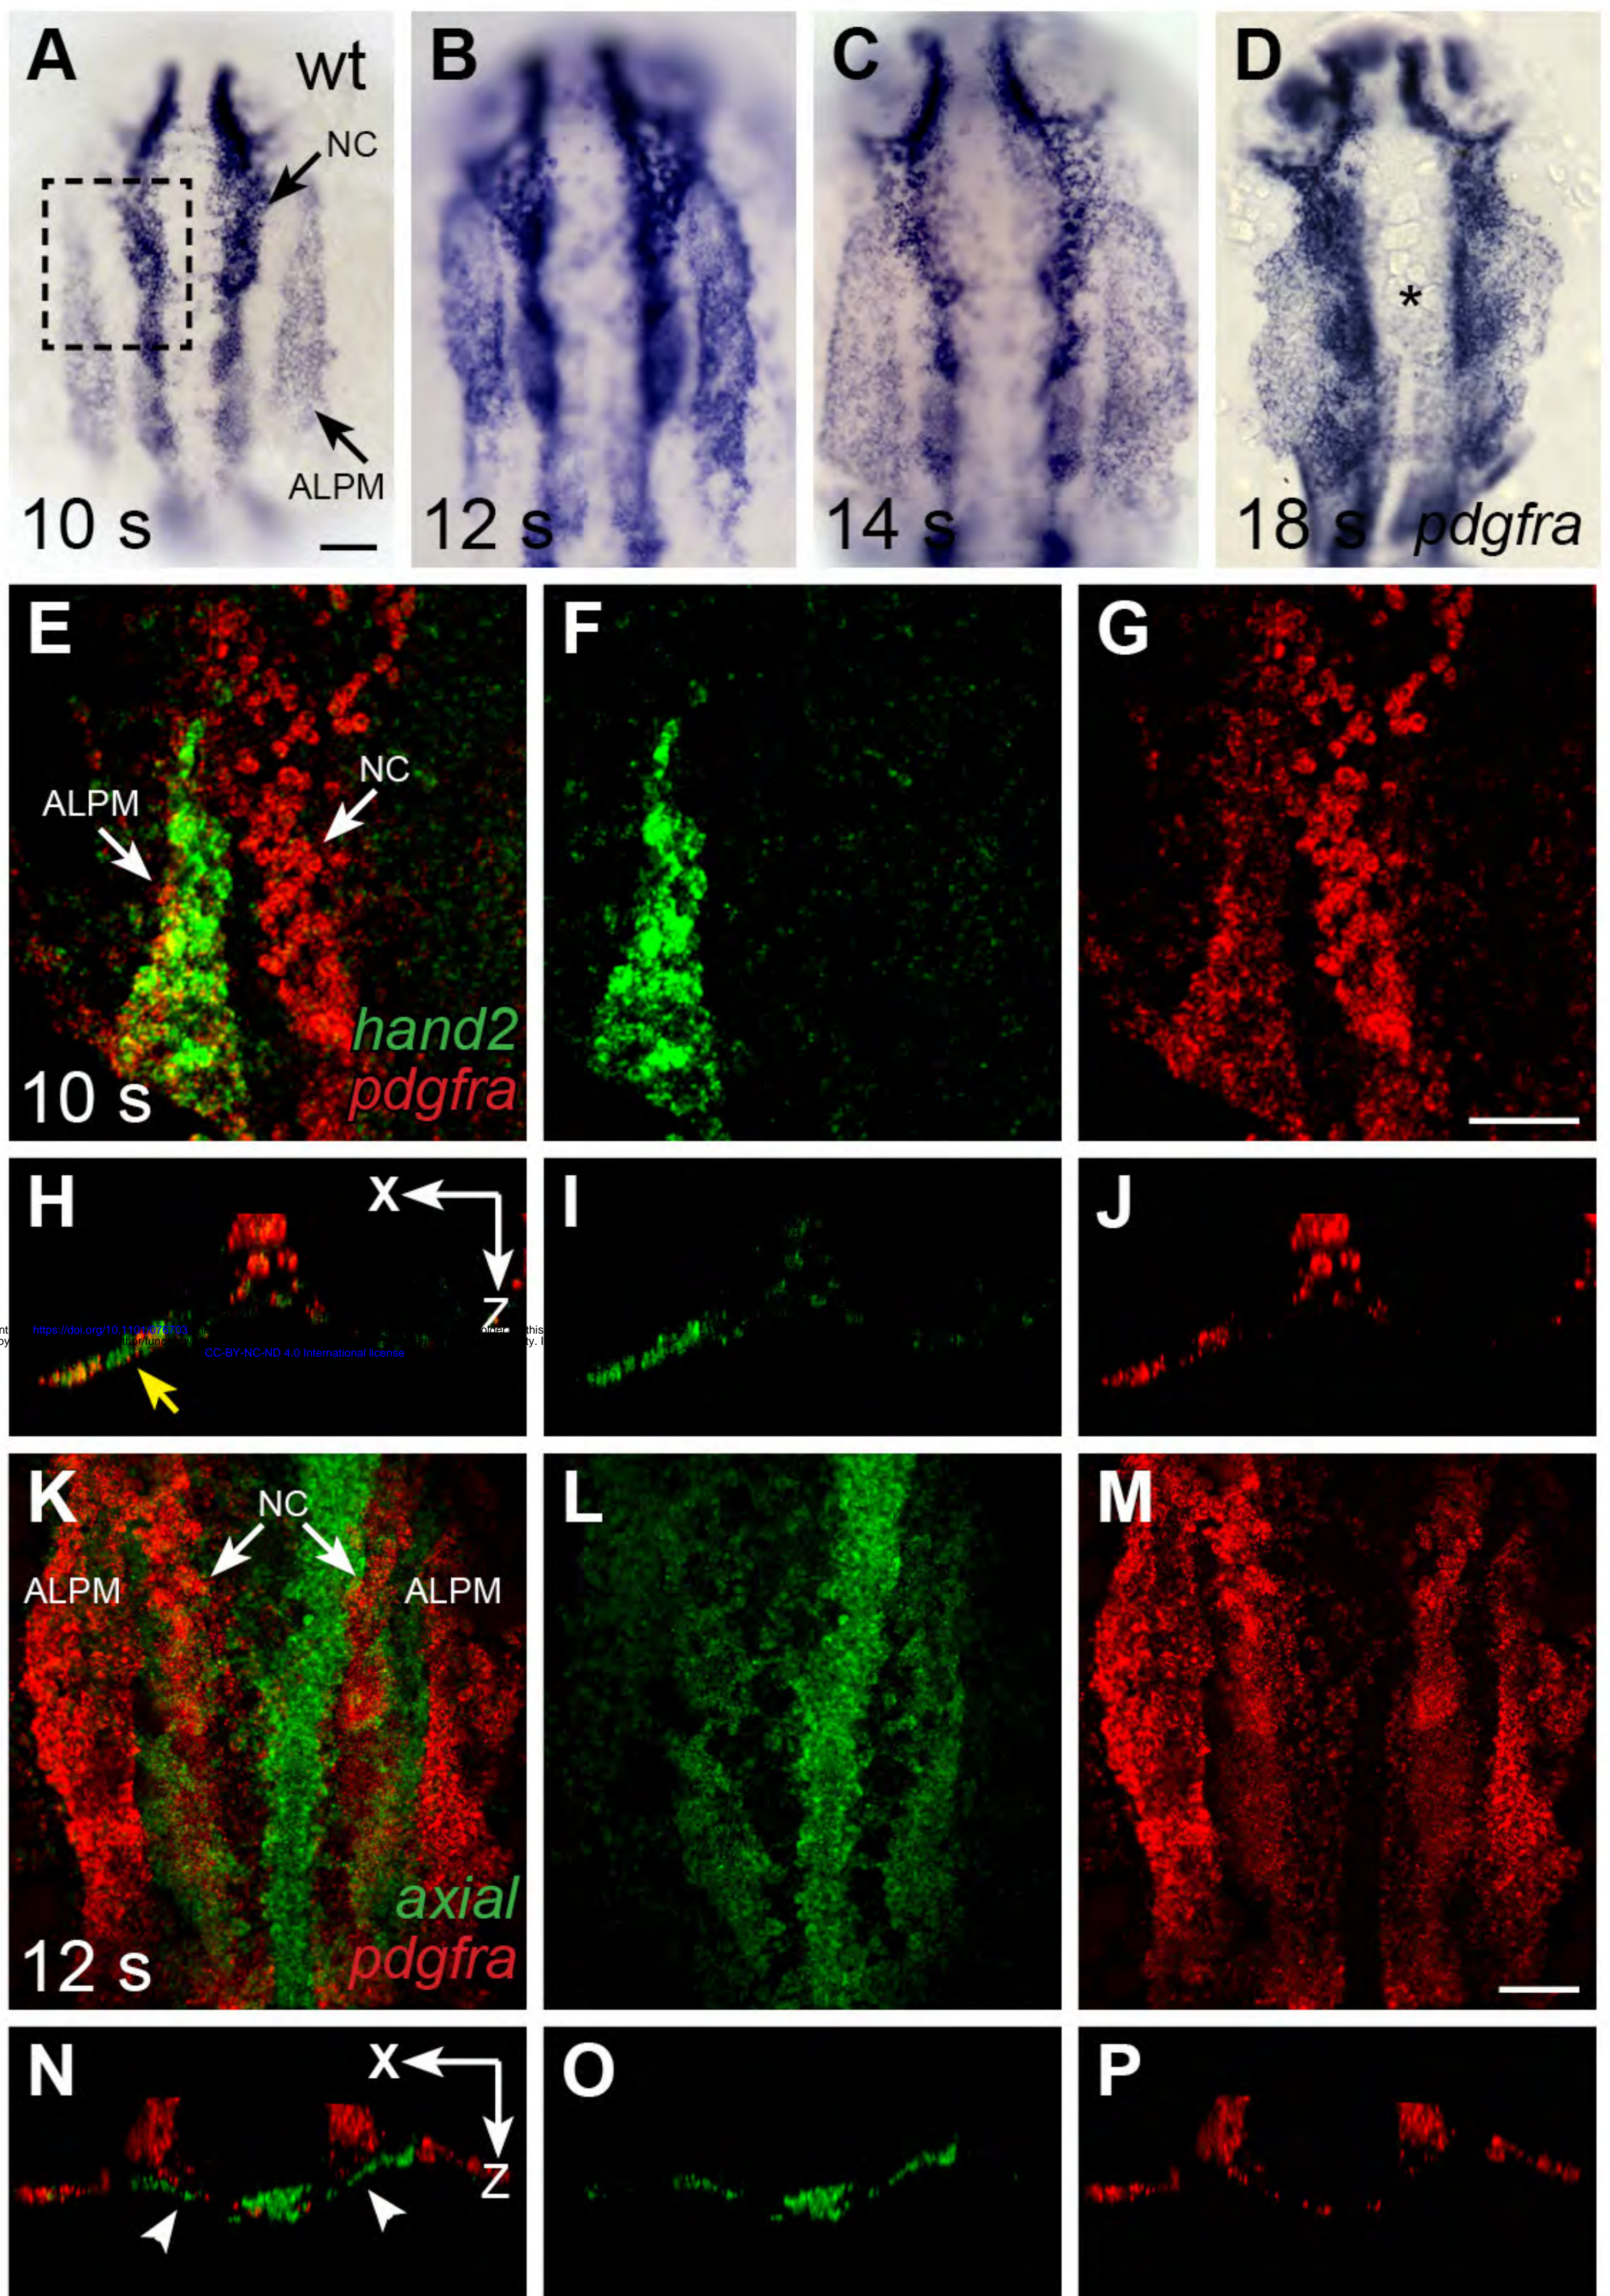

**FIGURE 5**

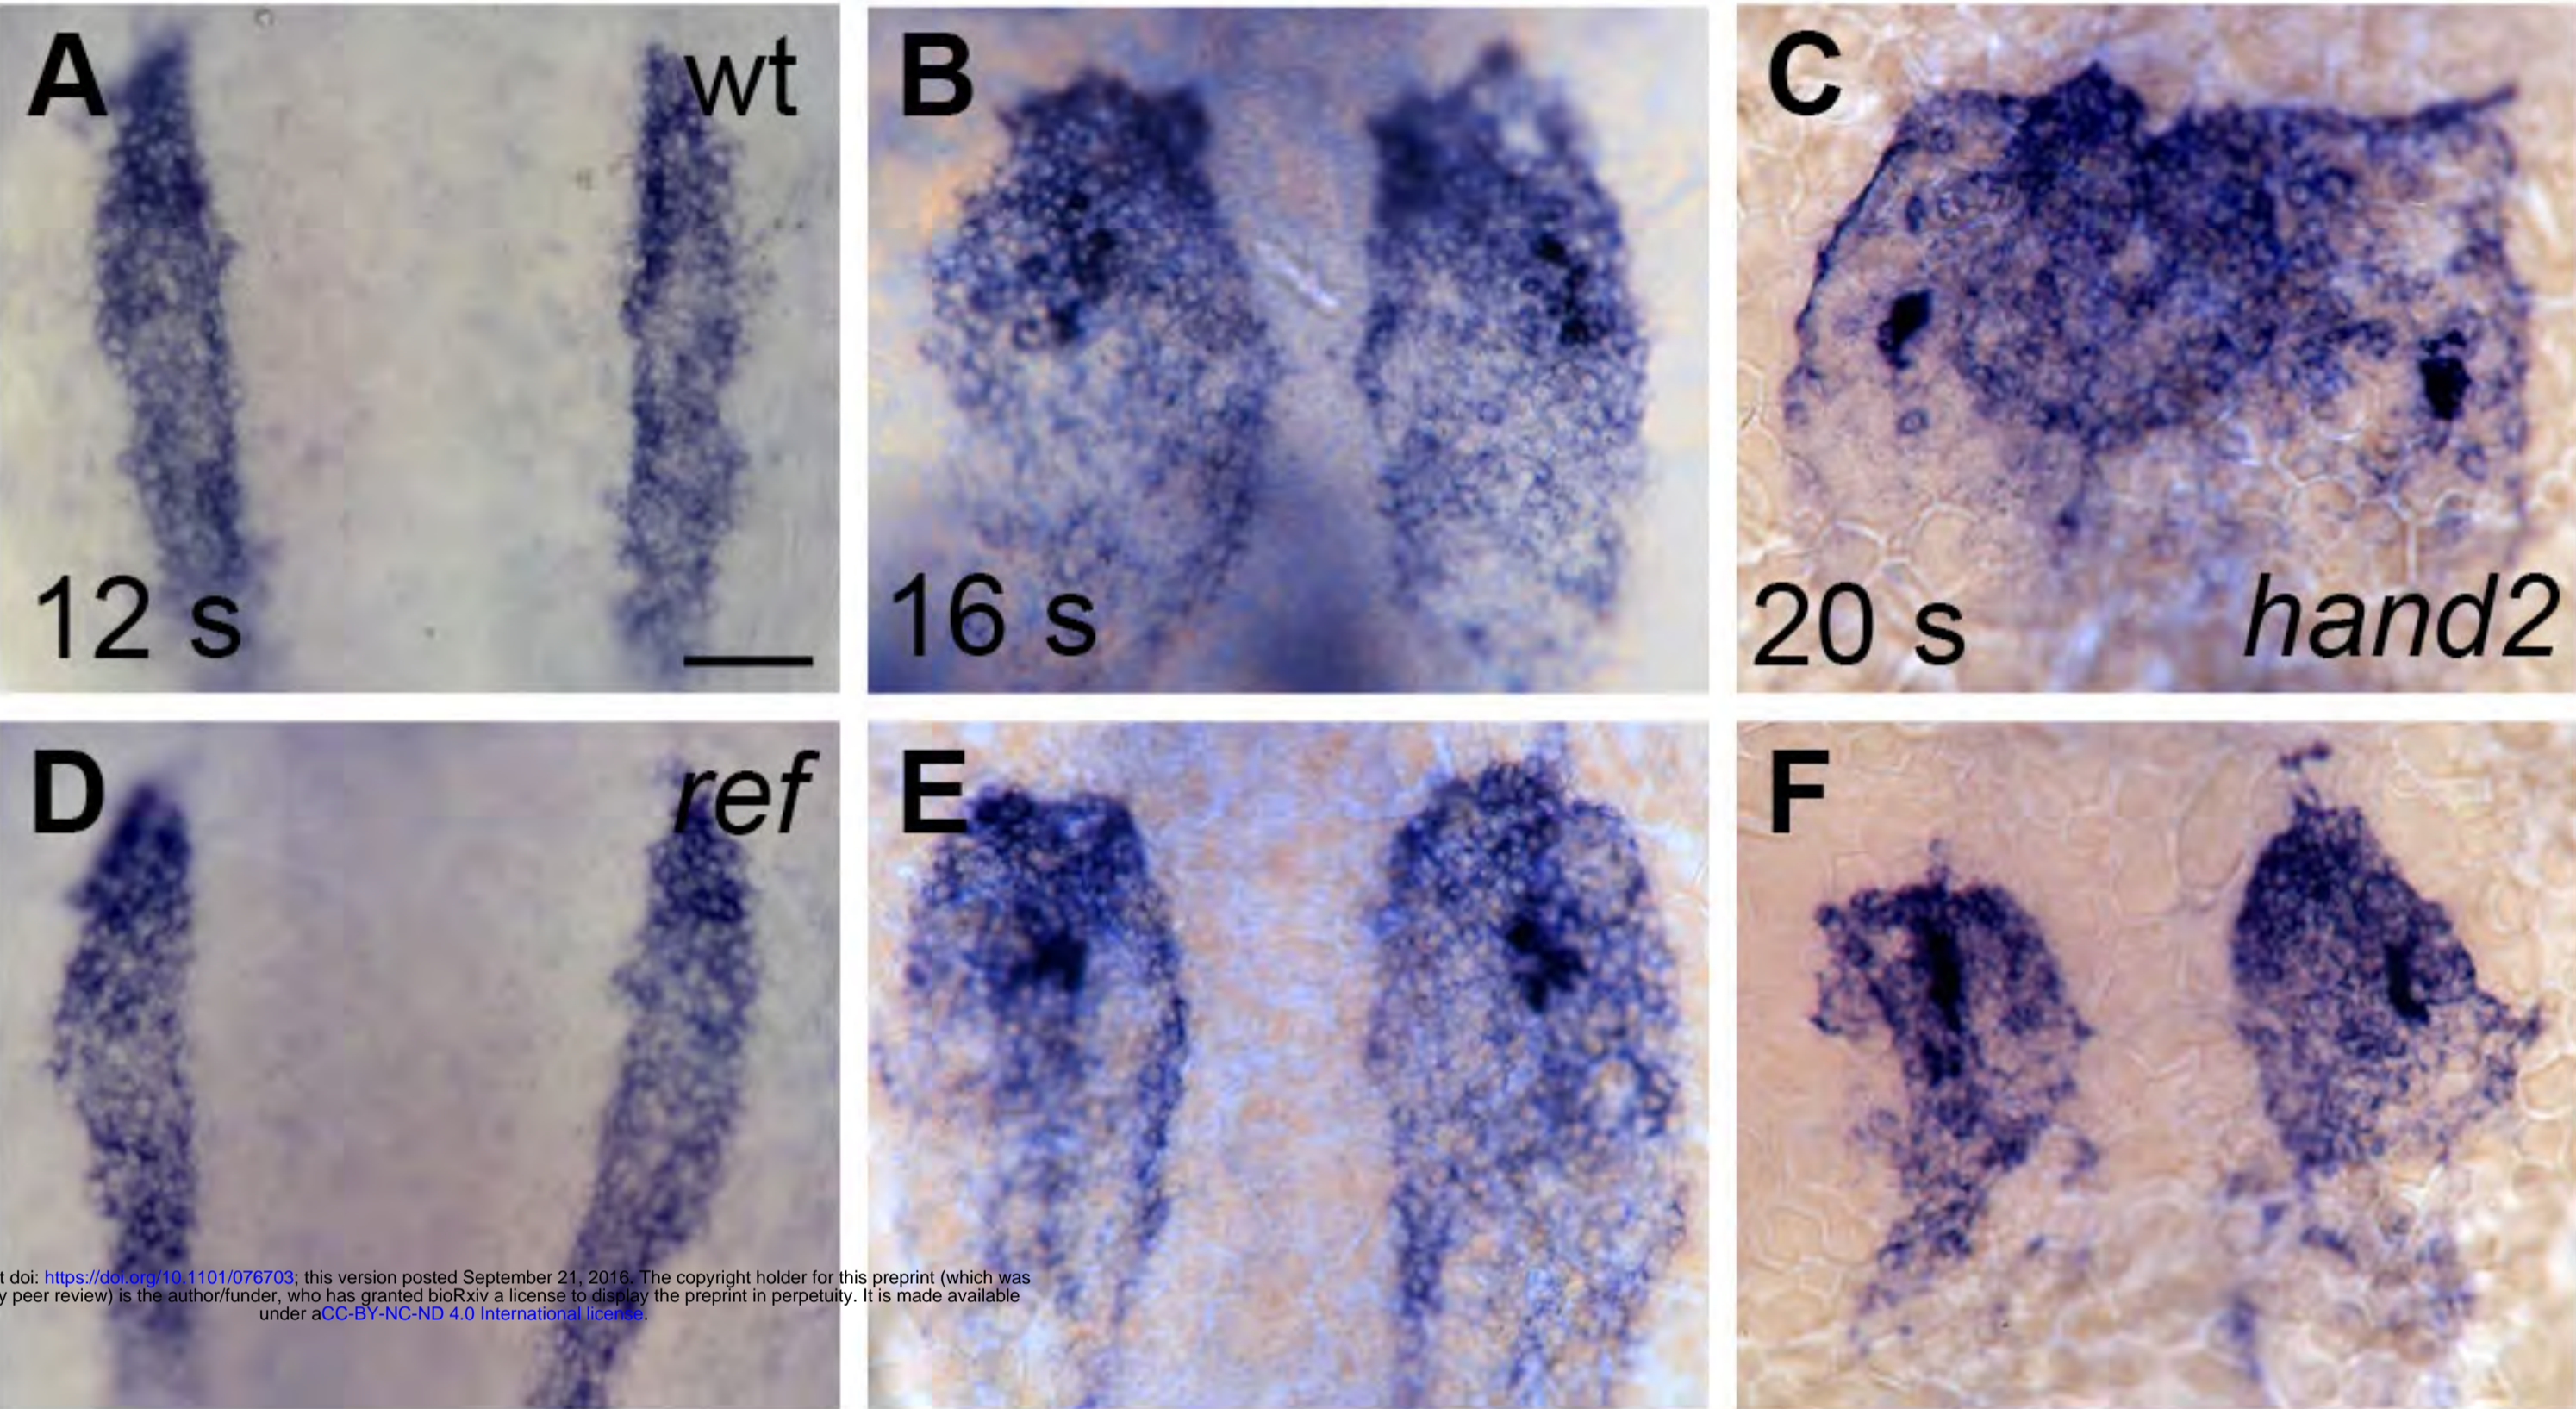

bioRxiv preprint doi: <https://doi.org/10.1101/076703>; this version posted September 21, 2016. The copyright holder for this preprint (which was not certified by peer review) is the author/funder, who has granted bioRxiv a license to display the preprint in perpetuity. It is made available under aCC-BY-NC-ND 4.0 International license.

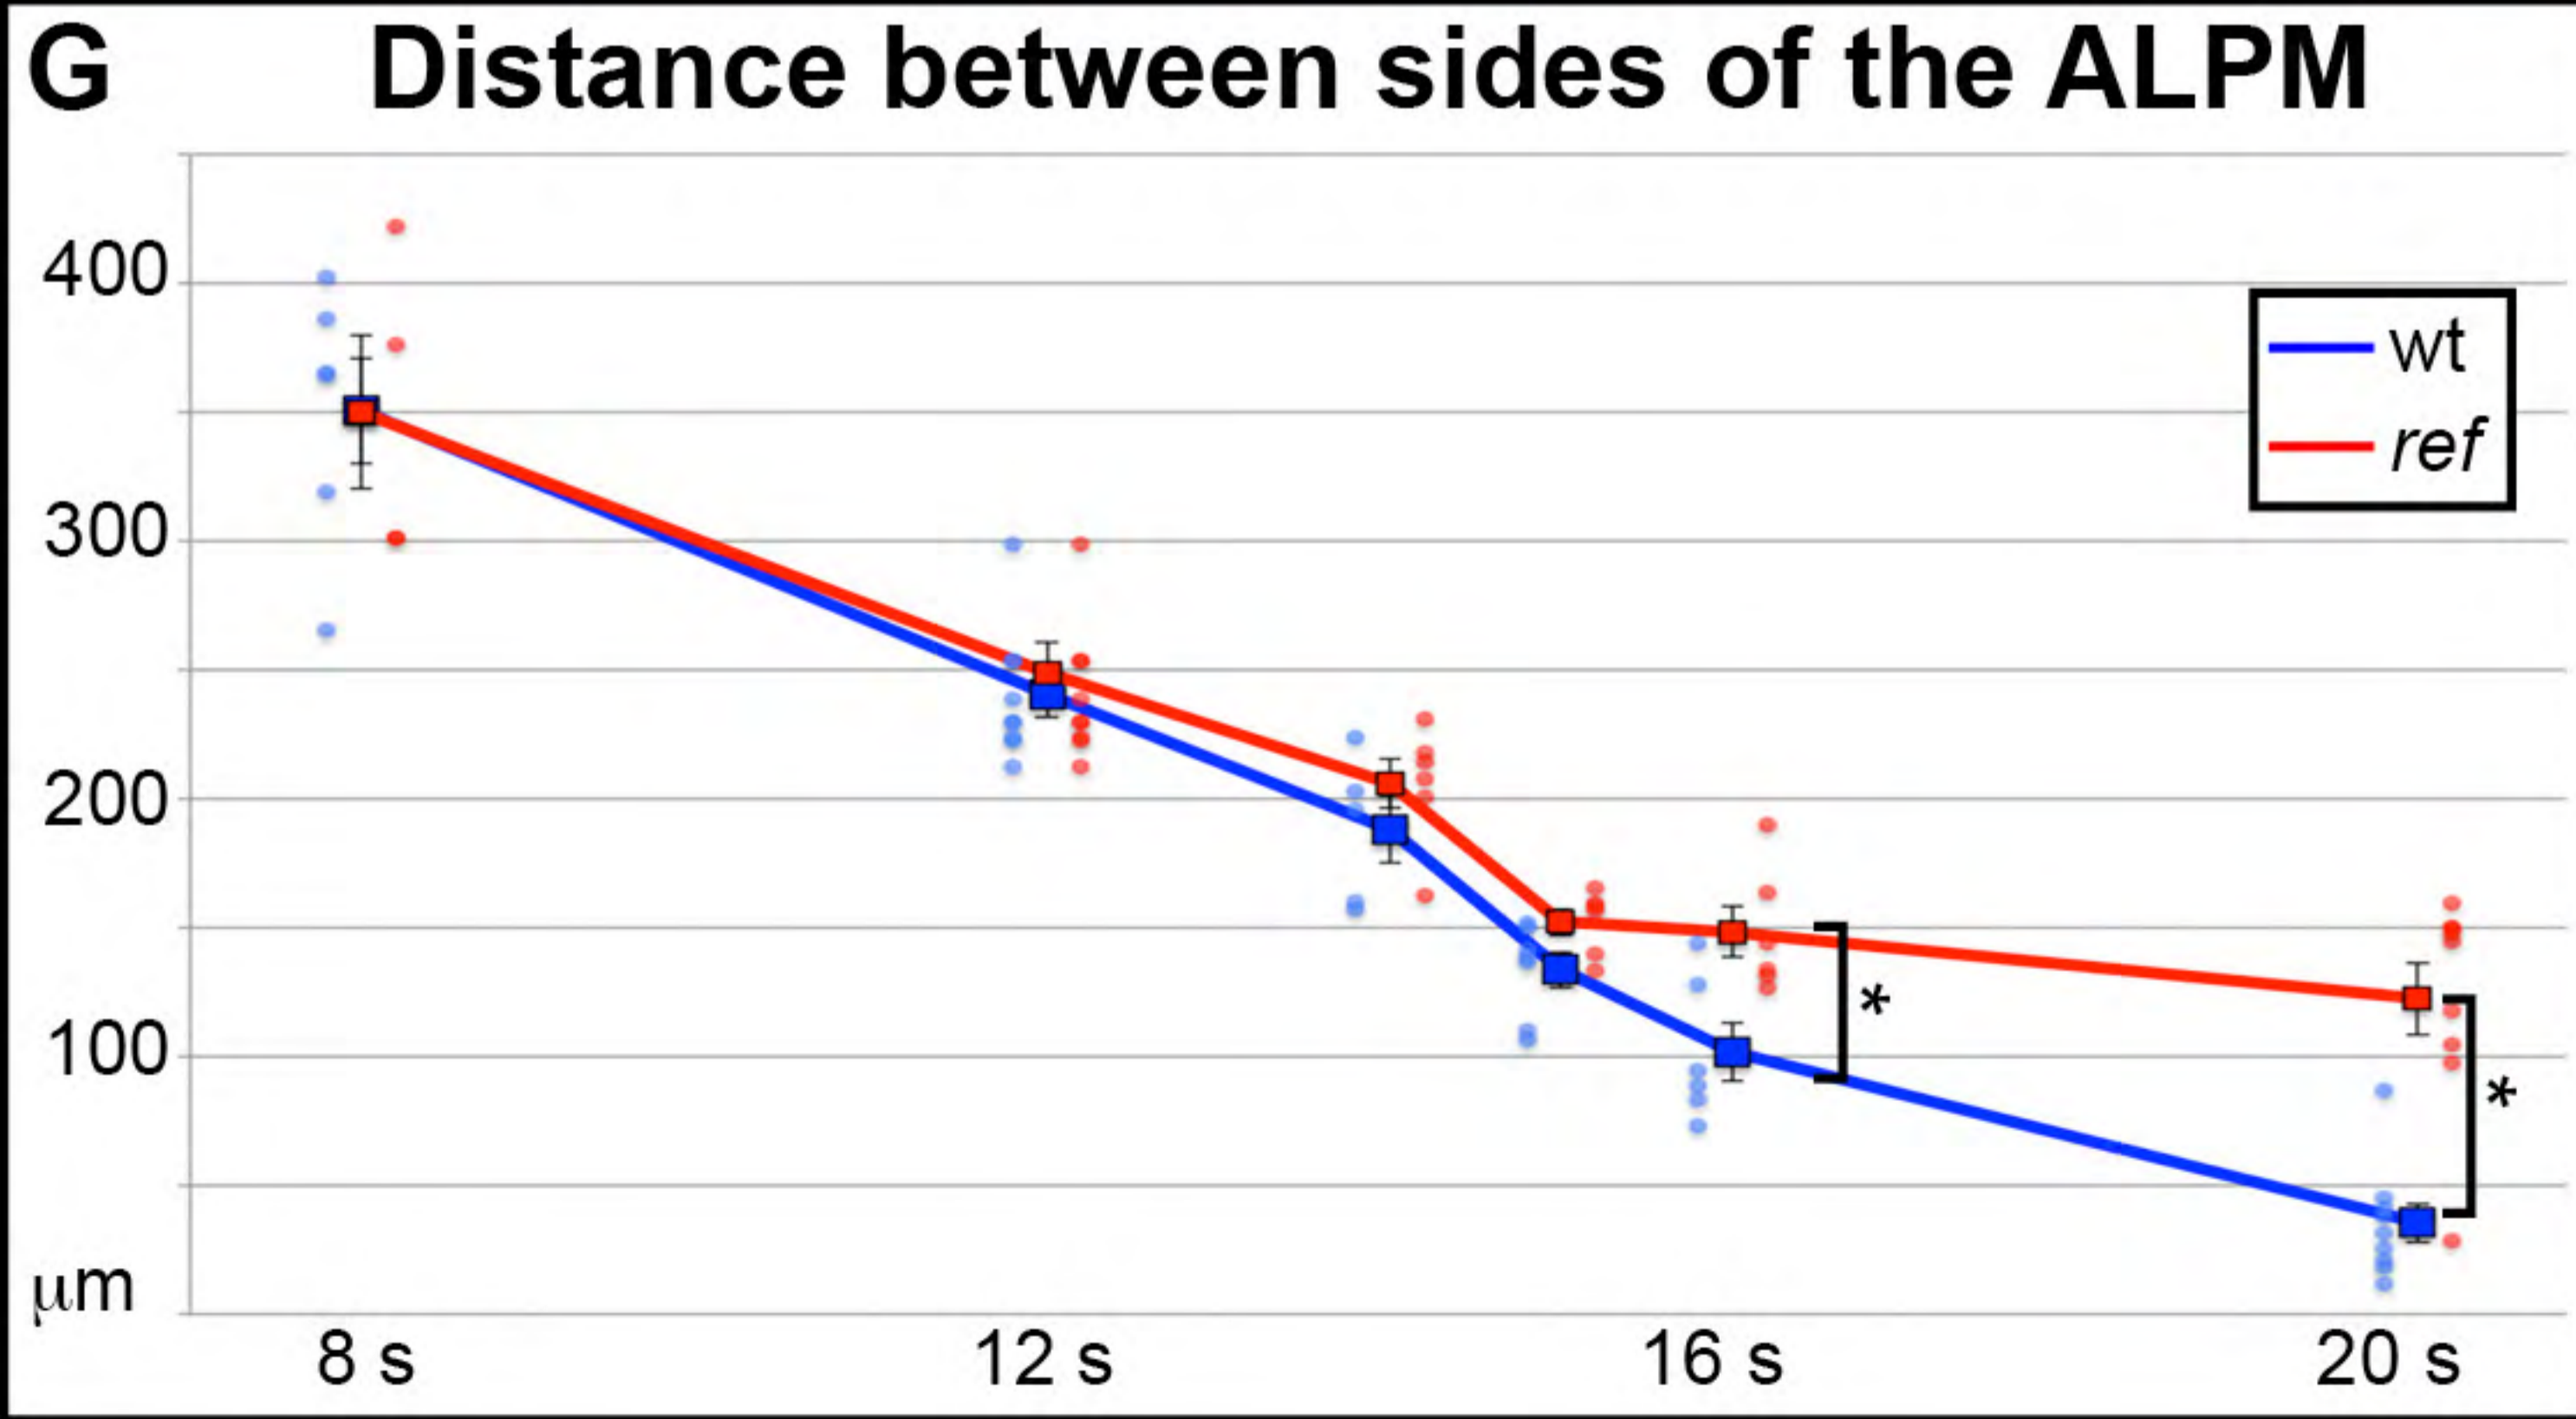

**FIGURE 5 - FIGURE SUPPLEMENT 1**

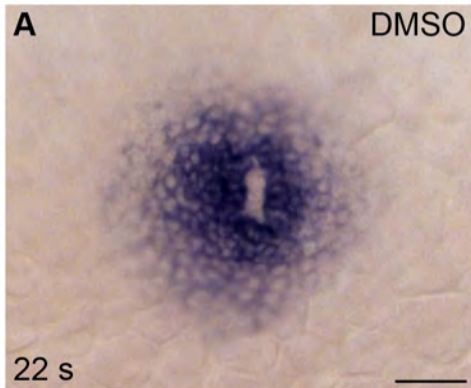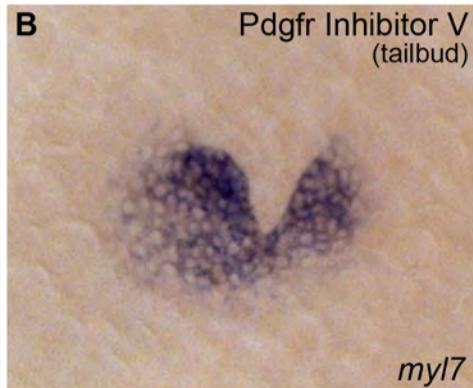



**FIGURE 7**

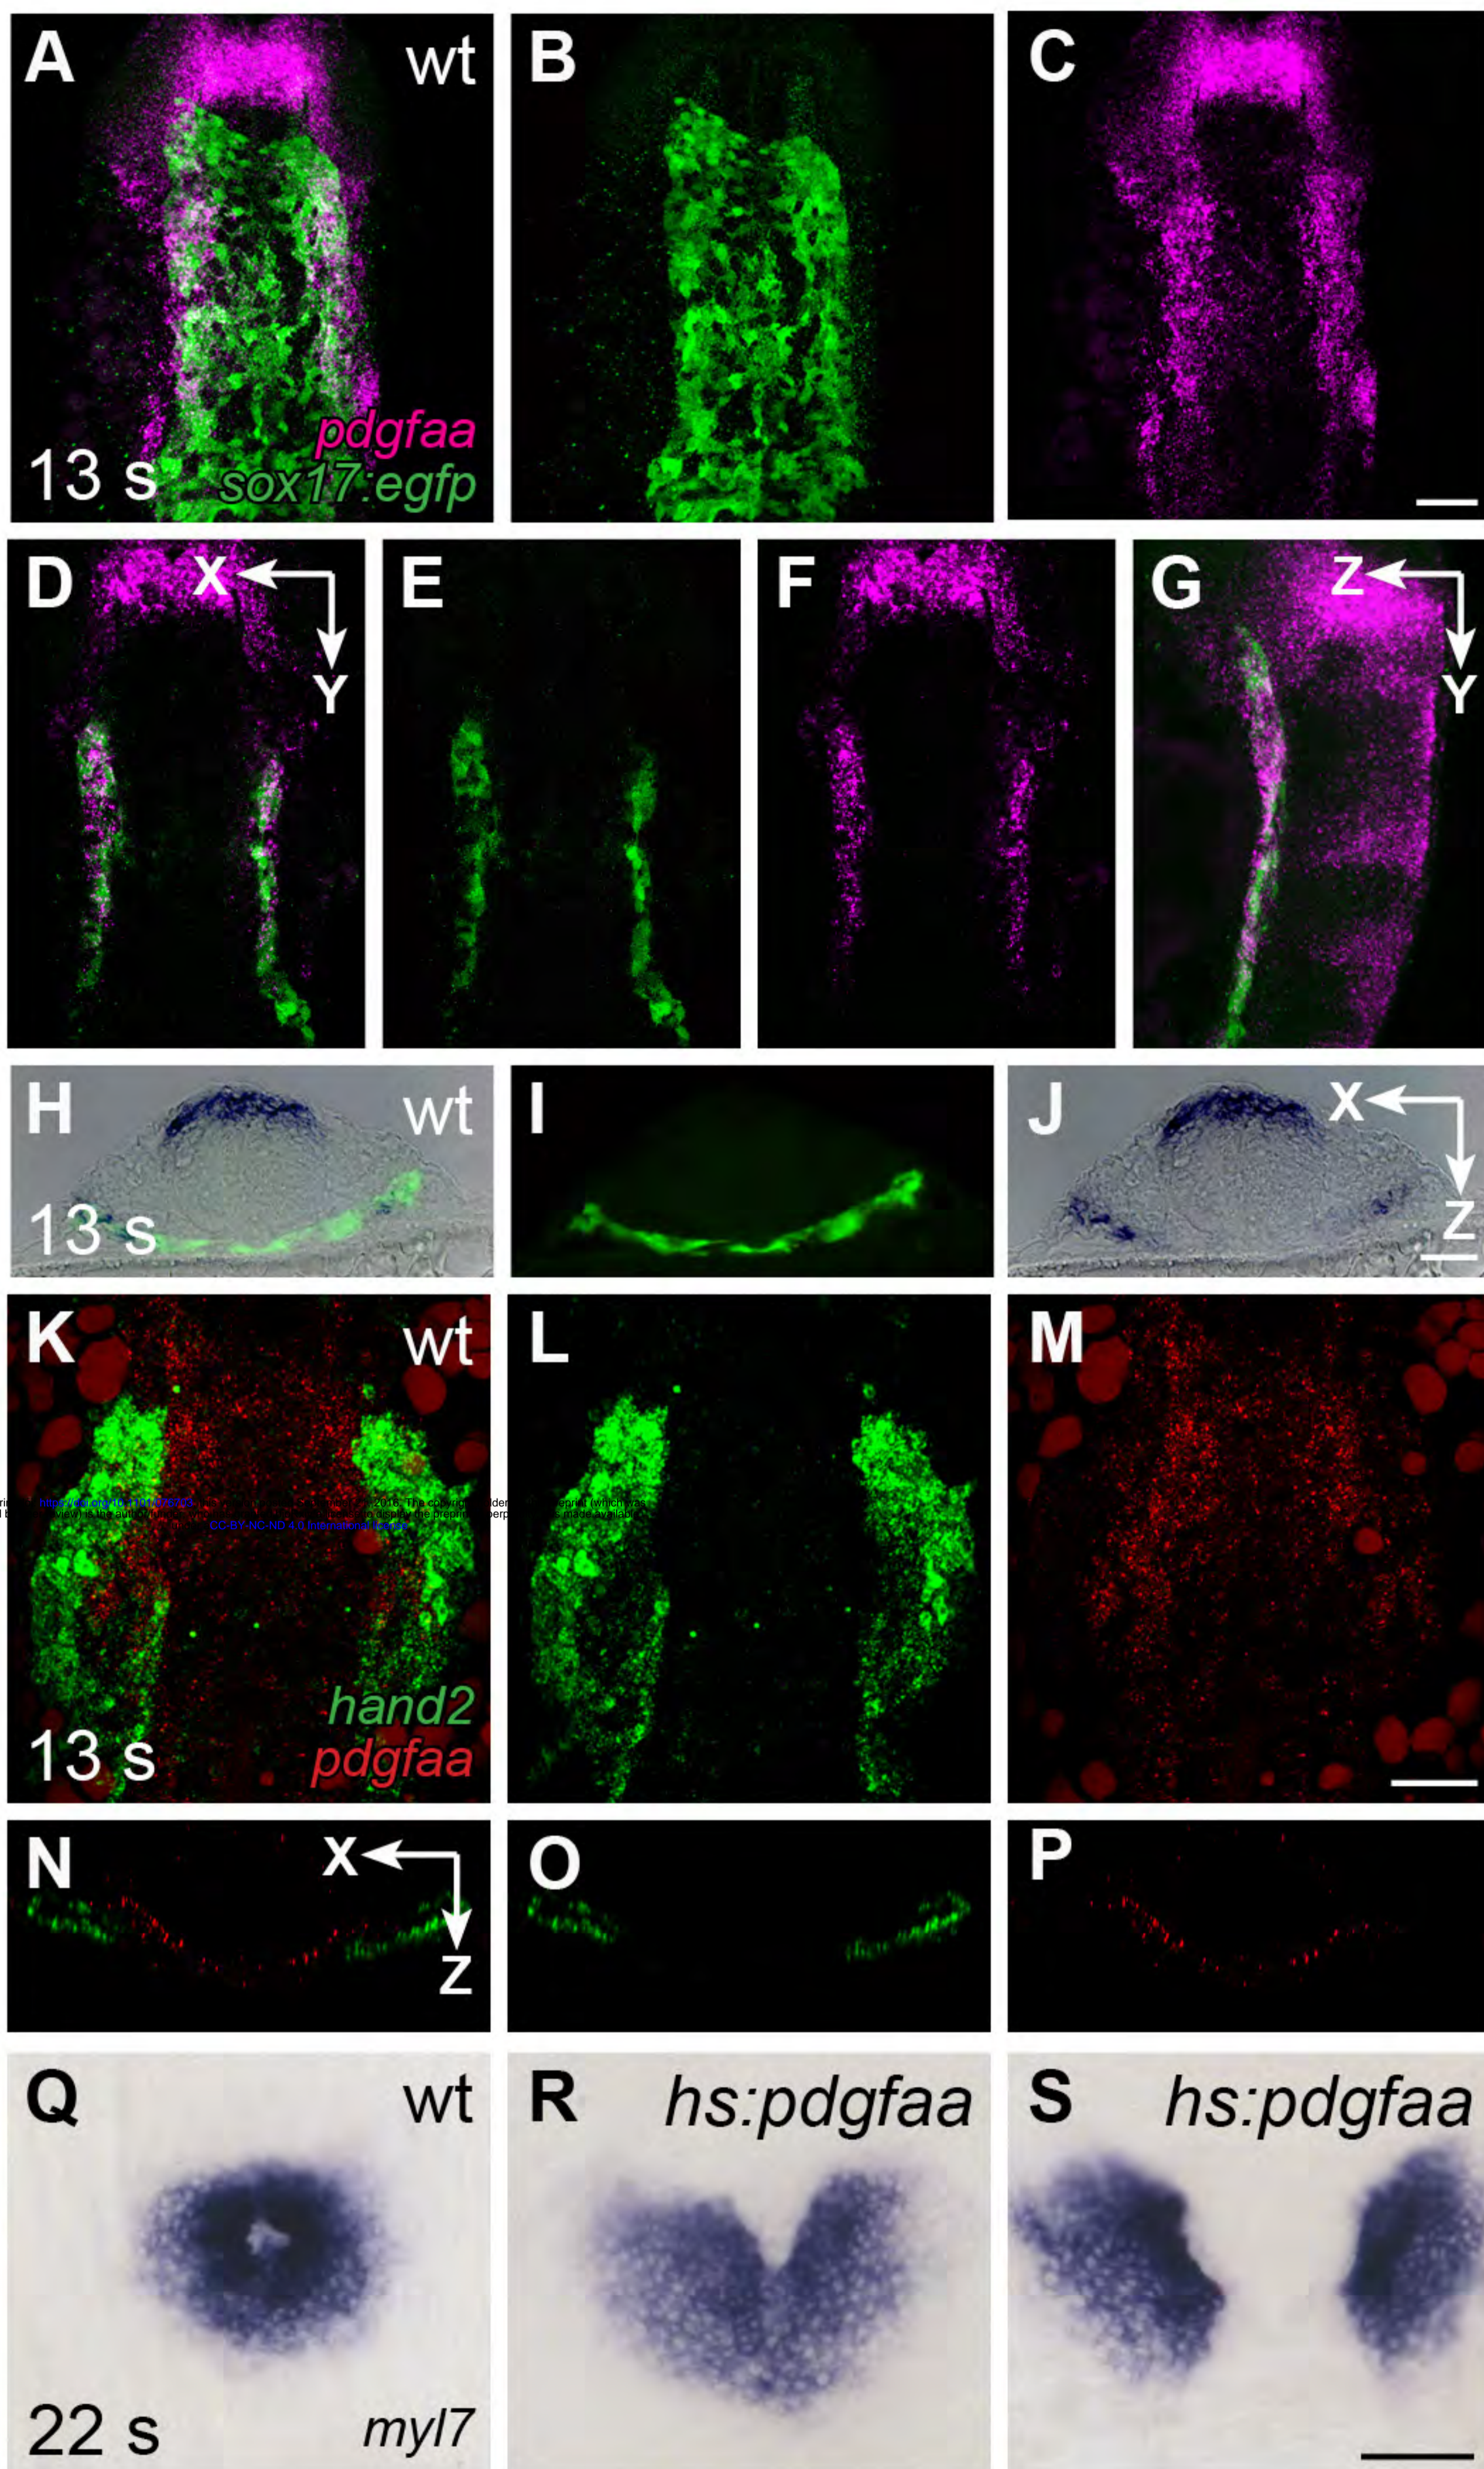

Source: https://www.biorxiv.org/content/10.1101/076703v1.full.pdf
